# Supplementary material
Source: PubMed Central journal article supplement (PMC4096228)
Supplement: mp400573g_si_002.pdf [file mp400573g_si_002.pdf]

**Table S1: GO Processes for Day 14**

| GO processes                                       |               | BMP-2     |                                                                                                                                                                                                                                                                                                                                                                                | TGF- $\beta$ 1 |                                                                                                                                                                                                                                                                                                                                                                                       | BMP-2 and TGF- $\beta$ 1 |                                                                                                                                                                                                                                                                                                                                                                                                                                             |
|----------------------------------------------------|---------------|-----------|--------------------------------------------------------------------------------------------------------------------------------------------------------------------------------------------------------------------------------------------------------------------------------------------------------------------------------------------------------------------------------|----------------|---------------------------------------------------------------------------------------------------------------------------------------------------------------------------------------------------------------------------------------------------------------------------------------------------------------------------------------------------------------------------------------|--------------------------|---------------------------------------------------------------------------------------------------------------------------------------------------------------------------------------------------------------------------------------------------------------------------------------------------------------------------------------------------------------------------------------------------------------------------------------------|
| Processes                                          | Min (p-Value) | p-value   | Genes from Active Data                                                                                                                                                                                                                                                                                                                                                         | p-value        | Genes from Active Data                                                                                                                                                                                                                                                                                                                                                                | p-value                  | Genes from Active Data                                                                                                                                                                                                                                                                                                                                                                                                                      |
| system development                                 | 6.723E-28     | 2.159E-17 | GDF5, alpha-6/beta-1 integrin, NGFR(TNFRSF16), VEGF-A, HDAC1, Histone deacetylase class I, LIF, PDGF-R-beta, CD45, ITGB1, SOX9, PPAR-gamma, TGF-beta, Frizzled, Notch, von Willebrand factor, FZD9, PDGF receptor, REX1, NOTCH1 precursor, BDNF, GDF7, IGF-1, VEGFR-2, Osteocalcin, ITGA6, VCAM1, IL-10, PAX8/PPARGgamma fusion protein, TGF-beta 3, Thy-1, BMP4, Beta-catenin | 5.319E-20      | alpha-6/beta-1 integrin, NGFR(TNFRSF16), Beta-2-microglobulin, HNF1, RUNX2, HDAC1, Histone deacetylase class I, LIF, ITGB1, SOX9, PPAR-gamma, MGF, TGF-beta, Actin cytoskeletal, G-CSF, Endoglin, ACTB, MMP-2, BDNF, GDF7, IGF-1, VEGFR-2, Osteocalcin, ITGA6, Oct-3/4, VCAM1, PAX8/PPARGgamma fusion protein, TGF-beta 3, Thy-1, FGF10, Actin, CD133, HNF1-alpha, Beta-catenin, RhoA | 6.723E-28                | BMP6, SMURF, Caspase-3, NGFR(TNFRSF16), IFN-gamma, HNF1, ITGAX, LIF, BMP2, CD45, ITGB1, SOX9, PPAR-gamma, ACTA2, MGF, TGF-beta, Frizzled, Notch, G-CSF, FZD9, Endoglin, NOTCH1 precursor, REX1, SMURF1, MMP-2, GDF7, 5'-NTD, IGF-1, VEGFR-2, Osteocalcin, Oct-3/4, VCAM1, CD13, FAK1, PAX8/PPARGgamma fusion protein, Actin muscle, CD166, CD44, TGF-beta 3, TNF-alpha, MCAM, FGF10, Thy-1, Actin, Integrin, HNF1-alpha, BMP7, Beta-catenin |
| organ development                                  | 5.300E-27     | 9.501E-22 | GDF5, alpha-6/beta-1 integrin, NGFR(TNFRSF16), VEGF-A, HDAC1, Histone deacetylase class I, LIF, PDGF-R-beta, CD45, ITGB1, SOX9, PPAR-gamma, TGF-beta, Frizzled, Notch, von Willebrand factor, FZD9, PDGF receptor, REX1, NOTCH1 precursor, BDNF, GDF7, IGF-1, VEGFR-2, Osteocalcin, ITGA6, VCAM1, IL-10, PAX8/PPARGgamma fusion protein, TGF-beta 3, Thy-1, BMP4, Beta-catenin | 9.501E-22      | alpha-6/beta-1 integrin, NGFR(TNFRSF16), Beta-2-microglobulin, HNF1, RUNX2, HDAC1, Histone deacetylase class I, LIF, ITGB1, SOX9, PPAR-gamma, MGF, TGF-beta, G-CSF, Endoglin, MMP-2, BDNF, GDF7, IGF-1, VEGFR-2, Osteocalcin, ITGA6, Oct-3/4, VCAM1, PAX8/PPARGgamma fusion protein, TGF-beta 3, Thy-1, FGF10, Actin, CD133, HNF1-alpha, Beta-catenin, RhoA                           | 5.300E-27                | BMP6, Caspase-3, NGFR(TNFRSF16), IFN-gamma, HNF1, ITGAX, LIF, BMP2, CD45, ITGB1, SOX9, PPAR-gamma, ACTA2, MGF, TGF-beta, Frizzled, Notch, G-CSF, FZD9, Endoglin, NOTCH1 precursor, REX1, MMP-2, GDF7, 5'-NTD, IGF-1, VEGFR-2, Osteocalcin, Oct-3/4, VCAM1, FAK1, PAX8/PPARGgamma fusion protein, Actin muscle, CD44, TGF-beta 3, TNF-alpha, FGF10, Thy-1, Actin, Integrin, HNF1-alpha, BMP7, Beta-catenin                                   |
| regulation of multicellular organismal development | 1.510E-26     | 2.149E-25 | GDF5, IL-1 beta, alpha-6/beta-1 integrin, NGFR(TNFRSF16), VEGF-A, HDAC1, Histone deacetylase                                                                                                                                                                                                                                                                                   | 5.060E-21      | alpha-6/beta-1 integrin, NGFR(TNFRSF16), HNF1, RUNX2, HDAC1, Histone deacetylase class I,                                                                                                                                                                                                                                                                                             | 1.510E-26                | BMP6, IL-1 beta, SMURF, NGFR(TNFRSF16), IFN-gamma, HNF1, LIF, BMP2, CD45, ITGB1, SOX9, PPAR-                                                                                                                                                                                                                                                                                                                                                |

|                                      |           |           |                                                                                                                                                                                                                                                                                                                                                                                          |           |                                                                                                                                                                                                                                                                                                                                                                                      |           |                                                                                                                                                                                                                                                                                                                                                                                                              |
|--------------------------------------|-----------|-----------|------------------------------------------------------------------------------------------------------------------------------------------------------------------------------------------------------------------------------------------------------------------------------------------------------------------------------------------------------------------------------------------|-----------|--------------------------------------------------------------------------------------------------------------------------------------------------------------------------------------------------------------------------------------------------------------------------------------------------------------------------------------------------------------------------------------|-----------|--------------------------------------------------------------------------------------------------------------------------------------------------------------------------------------------------------------------------------------------------------------------------------------------------------------------------------------------------------------------------------------------------------------|
|                                      |           |           | class I, LIF, PDGF-R-beta, CD45, ITGB1, SOX9, PPAR-gamma, TGF-beta, Frizzled, Notch, PDGF receptor, NOTCH1 precursor, BDNF, GDF7, IGF-1, VEGFR-2, Osteocalcin, IL-10, PAX8/PPARgamma fusion protein, TGF-beta 3, Thy-1, BMP4, Beta-catenin                                                                                                                                               |           | LIF, ITGB1, SOX9, PPAR-gamma, MGF, TGF-beta, Endoglin, BDNF, GDF7, IGF-1, VEGFR-2, Osteocalcin, Oct-3/4, PAX8/PPARgamma fusion protein, TGF-beta 3, Thy-1, FGF10, CD133, Beta-catenin, RhoA                                                                                                                                                                                          |           | gamma, MGF, TGF-beta, Frizzled, Notch, Endoglin, NOTCH1 precursor, SMURF1, GDF7, IGF-1, VEGFR-2, Osteocalcin, Oct-3/4, FAK1, PAX8/PPARgamma fusion protein, CD44, TGF-beta 3, TNF-alpha, FGF10, Thy-1, Integrin, BMP7, Beta-catenin                                                                                                                                                                          |
| cell differentiation                 | 2.905E-26 | 1.531E-18 | GDF5, alpha-6/beta-1 integrin, NGFR(TNFRSF16), VEGF-A, HDAC1, Histone deacetylase class I, LIF, PDGF-R-beta, CD45, ITGB1, SOX9, PPAR-gamma, TGF-beta, Frizzled, Notch, FZD9, PDGF receptor, REX1, NOTCH1 precursor, BDNF, GDF7, IGF-1, VEGFR-2, Osteocalcin, ITGA6, VCAM1, IL-10, PAX8/PPARgamma fusion protein, Thy-1, BMP4, Beta-catenin                                               | 3.528E-21 | alpha-6/beta-1 integrin, NGFR(TNFRSF16), Beta-2-microglobulin, HNF1, RUNX2, HDAC1, Histone deacetylase class I, LIF, ITGB1, SOX9, PPAR-gamma, MGF, TGF-beta, Actin cytoskeletal, G-CSF, Endoglin, ACTB, MMP-2, BDNF, GDF7, IGF-1, VEGFR-2, Osteocalcin, ITGA6, Oct-3/4, VCAM1, PAX8/PPARgamma fusion protein, Thy-1, FGF10, Actin, CD133, Beta-catenin, RhoA                         | 2.905E-26 | BMP6, SMURF, Caspase-3, NGFR(TNFRSF16), IFN-gamma, HNF1, LIF, BMP2, CD45, ITGB1, SOX9, PPAR-gamma, ACTA2, MGF, TGF-beta, Frizzled, Notch, G-CSF, FZD9, Endoglin, NOTCH1 precursor, REX1, SMURF1, MMP-2, GDF7, IGF-1, VEGFR-2, Osteocalcin, Oct-3/4, VCAM1, CD13, FAK1, PAX8/PPARgamma fusion protein, Actin muscle, CD166, CD44, TNF-alpha, FGF10, Thy-1, Actin, Integrin, BMP7, Beta-catenin                |
| multicellular organismal development | 4.130E-26 | 1.932E-16 | GDF5, IL-1 beta, alpha-6/beta-1 integrin, NGFR(TNFRSF16), VEGF-A, HDAC1, Histone deacetylase class I, LIF, PDGF-R-beta, CD45, ITGB1, SOX9, PPAR-gamma, TGF-beta, Frizzled, Notch, von Willebrand factor, FZD9, PDGF receptor, REX1, NOTCH1 precursor, BDNF, GDF7, IGF-1, VEGFR-2, Osteocalcin, ITGA6, VCAM1, IL-10, PAX8/PPARgamma fusion protein, TGF-beta 3, Thy-1, BMP4, Beta-catenin | 1.078E-17 | alpha-6/beta-1 integrin, NGFR(TNFRSF16), Beta-2-microglobulin, HNF1, RUNX2, HDAC1, Histone deacetylase class I, LIF, ITGB1, SOX9, PPAR-gamma, MGF, TGF-beta, Actin cytoskeletal, G-CSF, Endoglin, ACTB, MMP-2, BDNF, GDF7, IGF-1, VEGFR-2, Osteocalcin, ITGA6, Oct-3/4, VCAM1, PAX8/PPARgamma fusion protein, TGF-beta 3, Thy-1, FGF10, Actin, CD133, HNF1-alpha, Beta-catenin, RhoA | 4.130E-26 | BMP6, IL-1 beta, SMURF, Caspase-3, NGFR(TNFRSF16), IFN-gamma, HNF1, ITGAX, LIF, BMP2, CD45, ITGB1, SOX9, PPAR-gamma, ACTA2, MGF, TGF-beta, Frizzled, Notch, G-CSF, FZD9, Endoglin, NOTCH1 precursor, REX1, SMURF1, MMP-2, GDF7, 5'-NTD, IGF-1, VEGFR-2, Osteocalcin, Oct-3/4, VCAM1, CD13, FAK1, PAX8/PPARgamma fusion protein, Actin muscle, CD166, CD44, TGF-beta 3, TNF-alpha, MCAM, FGF10, Thy-1, Actin, |

|                                  |           |           |                                                                                                                                                                                                                                                                                                                                              |           |                                                                                                                                                                                                                                                                                                                                                              |           |                                                                                                                                                                                                                                                                                                                                                                                               |
|----------------------------------|-----------|-----------|----------------------------------------------------------------------------------------------------------------------------------------------------------------------------------------------------------------------------------------------------------------------------------------------------------------------------------------------|-----------|--------------------------------------------------------------------------------------------------------------------------------------------------------------------------------------------------------------------------------------------------------------------------------------------------------------------------------------------------------------|-----------|-----------------------------------------------------------------------------------------------------------------------------------------------------------------------------------------------------------------------------------------------------------------------------------------------------------------------------------------------------------------------------------------------|
|                                  |           |           |                                                                                                                                                                                                                                                                                                                                              |           |                                                                                                                                                                                                                                                                                                                                                              |           | Integrin, HNF1-alpha, BMP7, Beta-catenin                                                                                                                                                                                                                                                                                                                                                      |
| cellular developmental process   | 1.071E-25 | 3.889E-18 | GDF5, alpha-6/beta-1 integrin, NGFR(TNFRSF16), VEGF-A, HDAC1, Histone deacetylase class I, LIF, PDGF-R-beta, CD45, ITGB1, SOX9, PPAR-gamma, TGF-beta, Frizzled, Notch, FZD9, PDGF receptor, REX1, NOTCH1 precursor, BDNF, GDF7, IGF-1, VEGFR-2, Osteocalcin, ITGA6, VCAM1, IL-10, PAX8/PPARgamma fusion protein, Thy-1, BMP4, Beta-catenin   | 9.649E-21 | alpha-6/beta-1 integrin, NGFR(TNFRSF16), Beta-2-microglobulin, HNF1, RUNX2, HDAC1, Histone deacetylase class I, LIF, ITGB1, SOX9, PPAR-gamma, MGF, TGF-beta, Actin cytoskeletal, G-CSF, Endoglin, ACTB, MMP-2, BDNF, GDF7, IGF-1, VEGFR-2, Osteocalcin, ITGA6, Oct-3/4, VCAM1, PAX8/PPARgamma fusion protein, Thy-1, FGF10, Actin, CD133, Beta-catenin, RhoA | 1.071E-25 | BMP6, SMURF, Caspase-3, NGFR(TNFRSF16), IFN-gamma, HNF1, LIF, BMP2, CD45, ITGB1, SOX9, PPAR-gamma, ACTA2, MGF, TGF-beta, Frizzled, Notch, G-CSF, FZD9, Endoglin, NOTCH1 precursor, REX1, SMURF1, MMP-2, GDF7, IGF-1, VEGFR-2, Osteocalcin, Oct-3/4, VCAM1, CD13, FAK1, PAX8/PPARgamma fusion protein, Actin muscle, CD166, CD44, TNF-alpha, FGF10, Thy-1, Actin, Integrin, BMP7, Beta-catenin |
| organ morphogenesis              | 1.464E-25 | 2.800E-20 | alpha-6/beta-1 integrin, NGFR(TNFRSF16), VEGF-A, HDAC1, Histone deacetylase class I, LIF, PDGF-R-beta, SOX9, PPAR-gamma, TGF-beta, Frizzled, Notch, PDGF receptor, NOTCH1 precursor, GDF7, IGF-1, Osteocalcin, ITGA6, PAX8/PPARgamma fusion protein, TGF-beta 3, Thy-1, BMP4, Beta-catenin                                                   | 1.025E-21 | alpha-6/beta-1 integrin, NGFR(TNFRSF16), HNF1, RUNX2, HDAC1, Histone deacetylase class I, LIF, SOX9, PPAR-gamma, TGF-beta, Endoglin, MMP-2, GDF7, IGF-1, Osteocalcin, ITGA6, PAX8/PPARgamma fusion protein, TGF-beta 3, Thy-1, FGF10, Actin, CD133, HNF1-alpha, Beta-catenin                                                                                 | 1.464E-25 | BMP6, NGFR(TNFRSF16), HNF1, ITGAX, LIF, BMP2, SOX9, PPAR-gamma, TGF-beta, Frizzled, Notch, Endoglin, NOTCH1 precursor, MMP-2, GDF7, IGF-1, Osteocalcin, FAK1, PAX8/PPARgamma fusion protein, Actin muscle, CD44, TGF-beta 3, TNF-alpha, FGF10, Thy-1, Actin, Integrin, HNF1-alpha, BMP7, Beta-catenin                                                                                         |
| anatomical structure development | 1.942E-25 | 9.615E-16 | GDF5, alpha-6/beta-1 integrin, NGFR(TNFRSF16), VEGF-A, HDAC1, Histone deacetylase class I, LIF, PDGF-R-beta, CD45, ITGB1, SOX9, PPAR-gamma, TGF-beta, Frizzled, Notch, von Willebrand factor, FZD9, PDGF receptor, REX1, NOTCH1 precursor, BDNF, GDF7, IGF-1, VEGFR-2, Osteocalcin, ITGA6, VCAM1, IL-10, PAX8/PPARgamma fusion protein, TGF- | 3.210E-18 | alpha-6/beta-1 integrin, NGFR(TNFRSF16), Beta-2-microglobulin, HNF1, RUNX2, HDAC1, Histone deacetylase class I, LIF, ITGB1, SOX9, PPAR-gamma, MGF, TGF-beta, Actin cytoskeletal, G-CSF, Endoglin, ACTB, MMP-2, BDNF, GDF7, IGF-1, VEGFR-2, Osteocalcin, ITGA6, Oct-3/4, VCAM1, PAX8/PPARgamma fusion protein, TGF-                                           | 1.942E-25 | BMP6, SMURF, Caspase-3, NGFR(TNFRSF16), IFN-gamma, HNF1, ITGAX, LIF, BMP2, CD45, ITGB1, SOX9, PPAR-gamma, ACTA2, MGF, TGF-beta, Frizzled, Notch, G-CSF, FZD9, Endoglin, NOTCH1 precursor, REX1, SMURF1, MMP-2, GDF7, 5'-NTD, IGF-1, VEGFR-2, Osteocalcin, Oct-3/4, VCAM1, CD13, FAK1, PAX8/PPARgamma                                                                                          |

|                                    |           |           |                                                                                                                                                                                                                                                                                                                                                                   |           |                                                                                                                                                                                                                                                                                                                                                    |           |                                                                                                                                                                                                                                                                                                                                                                |
|------------------------------------|-----------|-----------|-------------------------------------------------------------------------------------------------------------------------------------------------------------------------------------------------------------------------------------------------------------------------------------------------------------------------------------------------------------------|-----------|----------------------------------------------------------------------------------------------------------------------------------------------------------------------------------------------------------------------------------------------------------------------------------------------------------------------------------------------------|-----------|----------------------------------------------------------------------------------------------------------------------------------------------------------------------------------------------------------------------------------------------------------------------------------------------------------------------------------------------------------------|
|                                    |           |           | beta 3, Thy-1, BMP4, Beta-catenin                                                                                                                                                                                                                                                                                                                                 |           | beta 3, Thy-1, FGF10, Actin, CD133, HNF1-alpha, Beta-catenin, RhoA                                                                                                                                                                                                                                                                                 |           | fusion protein, Actin muscle, CD166, CD44, TGF-beta 3, TNF-alpha, MCAM, FGF10, Thy-1, Actin, Integrin, HNF1-alpha, BMP7, Beta-catenin                                                                                                                                                                                                                          |
| tissue development                 | 3.813E-25 | 5.604E-21 | GDF5, alpha-6/beta-1 integrin, NGFR(TNFRSF16), VEGF-A, HDAC1, Histone deacetylase class I, LIF, PDGF-R-beta, ITGB1, SOX9, PPAR-gamma, TGF-beta, Frizzled, Notch, von Willebrand factor, PDGF receptor, NOTCH1 precursor, GDF7, IGF-1, VEGFR-2, Osteocalcin, VCAM1, IL-10, PAX8/PPARgamma fusion protein, BMP4, Beta-catenin                                       | 2.186E-22 | alpha-6/beta-1 integrin, NGFR(TNFRSF16), HNF1, RUNX2, HDAC1, Histone deacetylase class I, LIF, ITGB1, SOX9, PPAR-gamma, MGF, TGF-beta, Endoglin, MMP-2, GDF7, IGF-1, VEGFR-2, Osteocalcin, Oct-3/4, VCAM1, PAX8/PPARgamma fusion protein, FGF10, Actin, CD133, HNF1-alpha, Beta-catenin, RhoA                                                      | 3.813E-25 | BMP6, SMURF, Caspase-3, NGFR(TNFRSF16), HNF1, LIF, BMP2, ITGB1, SOX9, PPAR-gamma, ACTA2, MGF, TGF-beta, Frizzled, Notch, Endoglin, NOTCH1 precursor, SMURF1, MMP-2, GDF7, IGF-1, VEGFR-2, Osteocalcin, Oct-3/4, VCAM1, PAX8/PPARgamma fusion protein, Actin muscle, CD44, FGF10, HNF1-alpha, BMP7, Beta-catenin                                                |
| anatomical structure morphogenesis | 5.161E-25 | 1.408E-22 | GDF5, alpha-6/beta-1 integrin, NGFR(TNFRSF16), VEGF-A, HDAC1, Histone deacetylase class I, LIF, PDGF-R-beta, CD45, ITGB1, SOX9, PPAR-gamma, TGF-beta, Frizzled, Notch, von Willebrand factor, PDGF receptor, NOTCH1 precursor, BDNF, GDF7, IGF-1, VEGFR-2, Osteocalcin, ITGA6, VCAM1, IL-10, PAX8/PPARgamma fusion protein, TGF-beta 3, Thy-1, BMP4, Beta-catenin | 5.063E-24 | alpha-6/beta-1 integrin, NGFR(TNFRSF16), HNF1, RUNX2, HDAC1, Histone deacetylase class I, LIF, ITGB1, SOX9, PPAR-gamma, TGF-beta, Actin cytoskeletal, Endoglin, ACTB, MMP-2, BDNF, GDF7, IGF-1, VEGFR-2, Osteocalcin, ITGA6, Oct-3/4, VCAM1, PAX8/PPARgamma fusion protein, TGF-beta 3, Thy-1, FGF10, Actin, CD133, HNF1-alpha, Beta-catenin, RhoA | 5.161E-25 | BMP6, NGFR(TNFRSF16), HNF1, ITGAX, LIF, BMP2, CD45, ITGB1, SOX9, PPAR-gamma, TGF-beta, Frizzled, Notch, Endoglin, NOTCH1 precursor, MMP-2, GDF7, IGF-1, VEGFR-2, Osteocalcin, Oct-3/4, VCAM1, CD13, FAK1, PAX8/PPARgamma fusion protein, Actin muscle, CD166, CD44, TGF-beta 3, TNF-alpha, MCAM, FGF10, Thy-1, Actin, Integrin, HNF1-alpha, BMP7, Beta-catenin |
