# Supplementary material
Source: PubMed Central journal article supplement (PMC4096228)
Supplement: mp400573g_si_003.pdf [file mp400573g_si_003.pdf]

**Table S2: Go Processes Day 21**

|                                                    |               | BMP-2     |                                                                                                                                                                                                                                                                                                                                                                                                                       | TGF- $\beta$ 1 |                                                                                                                                                                                                                                                                                                                      | BMP-2 and TGF- $\beta$ 1 |                                                                                                                                                                                                                                                                                                                                                                                                            |
|----------------------------------------------------|---------------|-----------|-----------------------------------------------------------------------------------------------------------------------------------------------------------------------------------------------------------------------------------------------------------------------------------------------------------------------------------------------------------------------------------------------------------------------|----------------|----------------------------------------------------------------------------------------------------------------------------------------------------------------------------------------------------------------------------------------------------------------------------------------------------------------------|--------------------------|------------------------------------------------------------------------------------------------------------------------------------------------------------------------------------------------------------------------------------------------------------------------------------------------------------------------------------------------------------------------------------------------------------|
| Processes                                          | Min (p-Value) | p-value   | Genes from Active Data                                                                                                                                                                                                                                                                                                                                                                                                | p-value        | Genes from Active Data                                                                                                                                                                                                                                                                                               | p-value                  | Genes from Active Data                                                                                                                                                                                                                                                                                                                                                                                     |
| regulation of multicellular organismal development | 5.959E-37     | 5.959E-37 | GDF5, BMP6, IL-1 beta, SMURF, NGFR(TNFRSF16), IFN-gamma, COL1A1, HNF1, RUNX2, HDAC1, Histone deacetylase class I, LIF, PDGF-R-beta, BMP2, EGF, HGF, PPAR-gamma, MGF, TGF-beta, Endoglin, PDGF receptor, SMURF1, BDNF, GDF7, ErbB2, IGF-1, VEGFR-2, Osteocalcin, Oct-3/4, FAK1, SOX2, IL-10, PAX8/PPARgamma fusion protein, CD44, TGF-beta 3, TGF-beta 1, TNF-alpha, FGF10, Thy-1, Integrin, CD133, BMP4, Beta-catenin | 2.437E-29      | GDF5, IL-1 beta, SMURF, alpha-6/beta-1 integrin, IFN-gamma, VEGF-A, HNF1, LIF, PDGF-R-beta, CD45, ITGB1, EGF, MGF, TGF-beta, Endoglin, PDGF receptor, SMURF1, BDNF, GDF7, ErbB2, IGF-1, VEGFR-2, FAK1, WNT, CD44, TGF-beta 3, TGF-beta 1, TNF-alpha, FGF10, Thy-1, Integrin, SMAD4, CD133, BMP4, WNT3A, Beta-catenin | 2.673E-33                | GDF5, IL-1 beta, SMURF, alpha-6/beta-1 integrin, NGFR(TNFRSF16), IFN-gamma, VEGF-A, RUNX2, HDAC1, Histone deacetylase class I, LIF, PDGF-R-beta, ITGB1, EGF, PPAR-gamma, MGF, TGF-beta, Endoglin, PDGF receptor, SMURF1, BDNF, GDF7, ErbB2, Osteocalcin, FAK1, IL-10, PAX8/PPARgamma fusion protein, WNT, CD44, TGF-beta 3, TNF-alpha, TGF-beta 1, Thy-1, Integrin, CD133, TBX5, WNT3A, BMP7, Beta-catenin |
| organ development                                  | 4.959E-36     | 4.959E-36 | GDF5, BMP6, Caspase-3, NGFR(TNFRSF16), IFN-gamma, COL1A1, HNF1, ITGAX, RUNX2, HDAC1, Histone deacetylase class I, LIF, PDGF-R-beta, BMP2, EGF, HGF, PPAR-gamma, ACTA2, MGF, TGF-beta, G-CSF, Endoglin, PDGF receptor, REX1, MMP-2, BDNF, GDF7, ErbB2, MDR1, 5'-NTD, IGF-1, VEGFR-2, ITGA6,                                                                                                                            | 5.300E-27      | GDF5, alpha-6/beta-1 integrin, IFN-gamma, VEGF-A, HNF1, ITGAX, LIF, PDGF-R-beta, CD45, ITGB1, EGF, ACTA2, MGF, TGF-beta, G-CSF, Endoglin, PDGF receptor, MMP-2, BDNF, GDF7, ErbB2, 5'-NTD, IGF-1, VEGFR-2, ITGA6, VCAM1, FAK1, Actin                                                                                 | 4.747E-32                | GDF5, alpha-6/beta-1 integrin, Caspase-3, NGFR(TNFRSF16), IFN-gamma, VEGF-A, ITGAX, RUNX2, HDAC1, Histone deacetylase class I, LIF, PDGF-R-beta, ITGB1, EGF, PPAR-gamma, ACTA2, MGF, TGF-beta, G-CSF, Endoglin, PDGF receptor, REX1, MMP-2, BDNF, GDF7, ErbB2, 5'-NTD, ITGA6, Osteocalcin,                                                                                                                 |

|                     |           |           |                                                                                                                                                                                                                                                                                                                                                                                  |           |                                                                                                                                                                                                                                                                                    |           |                                                                                                                                                                                                                                                                                                                                                                      |
|---------------------|-----------|-----------|----------------------------------------------------------------------------------------------------------------------------------------------------------------------------------------------------------------------------------------------------------------------------------------------------------------------------------------------------------------------------------|-----------|------------------------------------------------------------------------------------------------------------------------------------------------------------------------------------------------------------------------------------------------------------------------------------|-----------|----------------------------------------------------------------------------------------------------------------------------------------------------------------------------------------------------------------------------------------------------------------------------------------------------------------------------------------------------------------------|
|                     |           |           | Osteocalcin, Oct-3/4, FAK1, SOX2, IL-10, PAX8/PPARgamma fusion protein, Actin muscle, CD44, TGF-beta 3, TGF-beta 1, TNF-alpha, FGF10, Thy-1, Actin, Integrin, CD133, HNF1-alpha, BMP4, Beta-catenin                                                                                                                                                                              |           | muscle, WNT, CD44, TGF-beta 3, TGF-beta 1, TNF-alpha, FGF10, Thy-1, Actin, Integrin, SMAD4, CD133, HNF1-alpha, BMP4, WNT3A, Beta-catenin                                                                                                                                           |           | VCAM1, FAK1, IL-10, PAX8/PPARgamma fusion protein, Actin muscle, WNT, CD44, TGF-beta 3, TNF-alpha, TGF-beta 1, Thy-1, Actin, Integrin, CD133, TBX5, WNT3A, BMP7, Beta-catenin                                                                                                                                                                                        |
| organ morphogenesis | 1.336E-33 | 1.336E-33 | BMP6, NGFR(TNFRSF16), COL1A1, HNF1, ITGAX, RUNX2, HDAC1, Histone deacetylase class I, LIF, PDGF-R-beta, BMP2, HGF, PPAR-gamma, TGF-beta, Endoglin, PDGF receptor, MMP-2, GDF7, IGF-1, ITGA6, Osteocalcin, FAK1, SOX2, PAX8/PPARgamma fusion protein, Actin muscle, CD44, TGF-beta 3, TGF-beta 1, TNF-alpha, FGF10, Thy-1, Actin, Integrin, CD133, HNF1-alpha, BMP4, Beta-catenin | 1.464E-25 | alpha-6/beta-1 integrin, VEGF-A, HNF1, ITGAX, LIF, PDGF-R-beta, TGF-beta, Endoglin, PDGF receptor, MMP-2, GDF7, IGF-1, ITGA6, FAK1, Actin muscle, WNT, CD44, TGF-beta 3, TGF-beta 1, TNF-alpha, FGF10, Thy-1, Actin, Integrin, SMAD4, CD133, HNF1-alpha, BMP4, WNT3A, Beta-catenin | 1.638E-29 | alpha-6/beta-1 integrin, NGFR(TNFRSF16), VEGF-A, ITGAX, RUNX2, HDAC1, Histone deacetylase class I, LIF, PDGF-R-beta, PPAR-gamma, TGF-beta, Endoglin, PDGF receptor, MMP-2, GDF7, ITGA6, Osteocalcin, FAK1, PAX8/PPARgamma fusion protein, Actin muscle, WNT, CD44, TGF-beta 3, TNF-alpha, TGF-beta 1, Thy-1, Actin, Integrin, CD133, TBX5, WNT3A, BMP7, Beta-catenin |
| system development  | 1.782E-33 | 1.782E-33 | GDF5, BMP6, SMURF, Caspase-3, NGFR(TNFRSF16), IFN-gamma, COL1A1, HNF1, ITGAX, RUNX2, HDAC1, Histone deacetylase class I, LIF, PDGF-R-beta, BMP2, EGF, HGF, PPAR-gamma, ACTA2, MGF, TGF-beta, G-CSF, Endoglin, PDGF receptor, REX1, SMURF1, MMP-2, BDNF, GDF7,                                                                                                                    | 1.764E-26 | GDF5, SMURF, alpha-6/beta-1 integrin, IFN-gamma, VEGF-A, HNF1, ITGAX, LIF, PDGF-R-beta, CD45, ITGB1, EGF, ACTA2, MGF, TGF-beta, G-CSF, Endoglin, PDGF receptor, SMURF1, MMP-2, BDNF, GDF7, ErbB2, 5'-NTD, IGF-1,                                                                   | 4.594E-30 | GDF5, SMURF, alpha-6/beta-1 integrin, Caspase-3, NGFR(TNFRSF16), IFN-gamma, VEGF-A, ITGAX, RUNX2, HDAC1, Histone deacetylase class I, LIF, PDGF-R-beta, ITGB1, EGF, PPAR-gamma, ACTA2, MGF, TGF-beta, G-CSF, Endoglin, PDGF receptor, REX1, SMURF1, MMP-2, BDNF,                                                                                                     |

|                                     |           |           |                                                                                                                                                                                                                                                                                                                                                                                                                       |           |                                                                                                                                                                                                                                                                                                                      |           |                                                                                                                                                                                                                                                                                                                                                                                                            |
|-------------------------------------|-----------|-----------|-----------------------------------------------------------------------------------------------------------------------------------------------------------------------------------------------------------------------------------------------------------------------------------------------------------------------------------------------------------------------------------------------------------------------|-----------|----------------------------------------------------------------------------------------------------------------------------------------------------------------------------------------------------------------------------------------------------------------------------------------------------------------------|-----------|------------------------------------------------------------------------------------------------------------------------------------------------------------------------------------------------------------------------------------------------------------------------------------------------------------------------------------------------------------------------------------------------------------|
|                                     |           |           | ErbB2, MDR1, 5'-NTD, IGF-1, VEGFR-2, ITGA6, Osteocalcin, Oct-3/4, FAK1, SOX2, IL-10, PAX8/PPARgamma fusion protein, Actin muscle, CD166, CD44, TGF-beta 3, TGF-beta 1, TNF-alpha, FGF10, Thy-1, Actin, Integrin, CD133, HNF1-alpha, BMP4, Beta-catenin                                                                                                                                                                |           | VEGFR-2, ITGA6, VCAM1, CD13, FAK1, Actin muscle, WNT, CD166, CD44, TGF-beta 3, TGF-beta 1, TNF-alpha, FGF10, Thy-1, Actin, Integrin, SMAD4, CD133, HNF1-alpha, BMP4, WNT3A, Beta-catenin                                                                                                                             |           | GDF7, ErbB2, 5'-NTD, ITGA6, Osteocalcin, VCAM1, FAK1, IL-10, PAX8/PPARgamma fusion protein, Actin muscle, WNT, CD166, CD44, TGF-beta 3, TNF-alpha, TGF-beta 1, Thy-1, Actin, Integrin, CD133, TBX5, WNT3A, BMP7, Beta-catenin                                                                                                                                                                              |
| regulation of developmental process | 6.790E-33 | 6.790E-33 | GDF5, BMP6, IL-1 beta, SMURF, NGFR(TNFRSF16), IFN-gamma, COL1A1, HNF1, RUNX2, HDAC1, Histone deacetylase class I, LIF, PDGF-R-beta, BMP2, EGF, HGF, PPAR-gamma, MGF, TGF-beta, Endoglin, PDGF receptor, SMURF1, BDNF, GDF7, ErbB2, IGF-1, VEGFR-2, Osteocalcin, Oct-3/4, FAK1, SOX2, IL-10, PAX8/PPARgamma fusion protein, CD44, TGF-beta 3, TGF-beta 1, TNF-alpha, FGF10, Thy-1, Integrin, CD133, BMP4, Beta-catenin | 5.578E-26 | GDF5, IL-1 beta, SMURF, alpha-6/beta-1 integrin, IFN-gamma, VEGF-A, HNF1, LIF, PDGF-R-beta, CD45, ITGB1, EGF, MGF, TGF-beta, Endoglin, PDGF receptor, SMURF1, BDNF, GDF7, ErbB2, IGF-1, VEGFR-2, FAK1, WNT, CD44, TGF-beta 3, TGF-beta 1, TNF-alpha, FGF10, Thy-1, Integrin, SMAD4, CD133, BMP4, WNT3A, Beta-catenin | 1.250E-29 | GDF5, IL-1 beta, SMURF, alpha-6/beta-1 integrin, NGFR(TNFRSF16), IFN-gamma, VEGF-A, RUNX2, HDAC1, Histone deacetylase class I, LIF, PDGF-R-beta, ITGB1, EGF, PPAR-gamma, MGF, TGF-beta, Endoglin, PDGF receptor, SMURF1, BDNF, GDF7, ErbB2, Osteocalcin, FAK1, IL-10, PAX8/PPARgamma fusion protein, WNT, CD44, TGF-beta 3, TNF-alpha, TGF-beta 1, Thy-1, Integrin, CD133, TBX5, WNT3A, BMP7, Beta-catenin |
| tissue development                  | 1.946E-32 | 1.946E-32 | GDF5, BMP6, SMURF, Caspase-3, NGFR(TNFRSF16), COL1A1, HNF1, RUNX2, HDAC1, Histone deacetylase class I, LIF, PDGF-R-beta, BMP2, HGF, PPAR-gamma, ACTA2, MGF, TGF-beta, Endoglin, PDGF                                                                                                                                                                                                                                  | 7.819E-24 | GDF5, SMURF, alpha-6/beta-1 integrin, VEGF-A, HNF1, LIF, PDGF-R-beta, ITGB1, ACTA2, MGF, TGF-beta, Endoglin, PDGF receptor, SMURF1, MMP-2, GDF7,                                                                                                                                                                     | 7.365E-29 | GDF5, SMURF, alpha-6/beta-1 integrin, Caspase-3, NGFR(TNFRSF16), VEGF-A, RUNX2, HDAC1, Histone deacetylase class I, LIF, PDGF-R-beta, ITGB1, PPAR-gamma, ACTA2, MGF, TGF-beta, Endoglin, PDGF                                                                                                                                                                                                              |

|                                                |           |           |                                                                                                                                                                                                                                                                                                                                                                                                                                         |           |                                                                                                                                                                                                                                                                                                                                              |           |                                                                                                                                                                                                                                                                                                                                                                                                                   |
|------------------------------------------------|-----------|-----------|-----------------------------------------------------------------------------------------------------------------------------------------------------------------------------------------------------------------------------------------------------------------------------------------------------------------------------------------------------------------------------------------------------------------------------------------|-----------|----------------------------------------------------------------------------------------------------------------------------------------------------------------------------------------------------------------------------------------------------------------------------------------------------------------------------------------------|-----------|-------------------------------------------------------------------------------------------------------------------------------------------------------------------------------------------------------------------------------------------------------------------------------------------------------------------------------------------------------------------------------------------------------------------|
|                                                |           |           | receptor, SMURF1, MMP-2, GDF7, ErbB2, IGF-1, VEGFR-2, Osteocalcin, Oct-3/4, SOX2, IL-10, PAX8/PPARgamma fusion protein, Actin muscle, CD44, TGF-beta 1, FGF10, Actin, CD133, HNF1-alpha, BMP4, Beta-catenin                                                                                                                                                                                                                             |           | ErbB2, IGF-1, VEGFR-2, VCAM1, Actin muscle, WNT, CD44, TGF-beta 1, FGF10, Actin, SMAD4, CD133, HNF1-alpha, BMP4, WNT3A, Beta-catenin                                                                                                                                                                                                         |           | receptor, SMURF1, MMP-2, GDF7, ErbB2, Osteocalcin, VCAM1, IL-10, PAX8/PPARgamma fusion protein, Actin muscle, WNT, CD44, TGF-beta 1, Actin, CD133, TBX5, WNT3A, BMP7, Beta-catenin                                                                                                                                                                                                                                |
| regulation of multicellular organismal process | 1.965E-31 | 1.965E-31 | GDF5, BMP6, IL-1 beta, Annexin V, SMURF, NGFR(TNFRSF16), IFN-gamma, COL1A1, HNF1, RUNX2, HDAC1, Histone deacetylase class I, LIF, PDGF-R-beta, BMP2, EGF, HGF, PPAR-gamma, MGF, TGF-beta, Endoglin, PDGF receptor, SMURF1, MMP-2, BDNF, GDF7, ErbB2, IGF-1, VEGFR-2, Osteocalcin, Oct-3/4, FAK1, SOX2, IL-10, PAX8/PPARgamma fusion protein, CD44, TGF-beta 3, TGF-beta 1, TNF-alpha, FGF10, Thy-1, Integrin, CD133, BMP4, Beta-catenin | 2.421E-26 | GDF5, IL-1 beta, Annexin V, SMURF, alpha-6/beta-1 integrin, IFN-gamma, VEGF-A, HNF1, LIF, PDGF-R-beta, CD45, ITGB1, EGF, MGF, TGF-beta, Endoglin, PDGF receptor, SMURF1, MMP-2, BDNF, GDF7, ErbB2, IGF-1, VEGFR-2, CD13, FAK1, WNT, CD44, TGF-beta 3, TGF-beta 1, TNF-alpha, FGF10, Thy-1, Integrin, SMAD4, CD133, BMP4, WNT3A, Beta-catenin | 3.492E-27 | GDF5, IL-1 beta, SMURF, alpha-6/beta-1 integrin, NGFR(TNFRSF16), IFN-gamma, VEGF-A, RUNX2, HDAC1, Histone deacetylase class I, LIF, PDGF-R-beta, ITGB1, EGF, PPAR-gamma, MGF, TGF-beta, Endoglin, PDGF receptor, SMURF1, MMP-2, BDNF, GDF7, ErbB2, Osteocalcin, FAK1, IL-10, PAX8/PPARgamma fusion protein, WNT, CD44, TGF-beta 3, TNF-alpha, TGF-beta 1, Thy-1, Integrin, CD133, TBX5, WNT3A, BMP7, Beta-catenin |
| anatomical structure morphogenesis             | 2.118E-31 | 2.118E-31 | GDF5, BMP6, NGFR(TNFRSF16), COL1A1, HNF1, ITGAX, RUNX2, HDAC1, Histone deacetylase class I, LIF, PDGF-R-beta, BMP2, EGF, HGF, PPAR-gamma, TGF-beta, Endoglin, PDGF receptor, MMP-2, BDNF, GDF7, ErbB2, IGF-1,                                                                                                                                                                                                                           | 1.186E-27 | GDF5, alpha-6/beta-1 integrin, VEGF-A, HNF1, ITGAX, LIF, PDGF-R-beta, CD45, ITGB1, EGF, TGF-beta, Endoglin, PDGF receptor, MMP-2, BDNF, GDF7, ErbB2, IGF-1, VEGFR-2, ITGA6,                                                                                                                                                                  | 1.671E-28 | GDF5, alpha-6/beta-1 integrin, NGFR(TNFRSF16), VEGF-A, ITGAX, RUNX2, HDAC1, Histone deacetylase class I, LIF, PDGF-R-beta, ITGB1, EGF, PPAR-gamma, TGF-beta, Endoglin, PDGF receptor, MMP-2, BDNF, GDF7, ErbB2, ITGA6,                                                                                                                                                                                            |

|                                      |           |           |                                                                                                                                                                                                                                                                                                                                                                                                                                                                                                                                 |           |                                                                                                                                                                                                                                                                                                                                                                                                                      |           |                                                                                                                                                                                                                                                                                                                                                                                                                                                                                                                 |
|--------------------------------------|-----------|-----------|---------------------------------------------------------------------------------------------------------------------------------------------------------------------------------------------------------------------------------------------------------------------------------------------------------------------------------------------------------------------------------------------------------------------------------------------------------------------------------------------------------------------------------|-----------|----------------------------------------------------------------------------------------------------------------------------------------------------------------------------------------------------------------------------------------------------------------------------------------------------------------------------------------------------------------------------------------------------------------------|-----------|-----------------------------------------------------------------------------------------------------------------------------------------------------------------------------------------------------------------------------------------------------------------------------------------------------------------------------------------------------------------------------------------------------------------------------------------------------------------------------------------------------------------|
|                                      |           |           | VEGFR-2, ITGA6, Osteocalcin, Oct-3/4, FAK1, SOX2, IL-10, PAX8/PPARgamma fusion protein, Actin muscle, CD166, CD44, TGF-beta 3, TGF-beta 1, TNF-alpha, FGF10, Thy-1, Actin, Integrin, CD133, HNF1-alpha, BMP4, Beta-catenin                                                                                                                                                                                                                                                                                                      |           | VCAM1, CD13, FAK1, Actin muscle, WNT, CD166, CD44, TGF-beta 3, TGF-beta 1, TNF-alpha, FGF10, Thy-1, Actin, Integrin, SMAD4, CD133, HNF1-alpha, BMP4, WNT3A, Beta-catenin                                                                                                                                                                                                                                             |           | Osteocalcin, VCAM1, FAK1, IL-10, PAX8/PPARgamma fusion protein, Actin muscle, WNT, CD166, CD44, TGF-beta 3, TNF-alpha, TGF-beta 1, Thy-1, Actin, Integrin, CD133, TBX5, WNT3A, BMP7, Beta-catenin                                                                                                                                                                                                                                                                                                               |
| multicellular organismal development | 2.608E-31 | 2.608E-31 | GDF5, BMP6, IL-1 beta, SMURF, Caspase-3, NGFR(TNFRSF16), IFN-gamma, COL1A1, HNF1, ITGAX, RUNX2, HDAC1, Histone deacetylase class I, LIF, PDGF-R-beta, BMP2, EGF, HGF, PPAR-gamma, ACTA2, MGF, TGF-beta, G-CSF, Endoglin, PDGF receptor, REX1, SMURF1, MMP-2, BDNF, GDF7, ErbB2, MDR1, 5'-NTD, IGF-1, VEGFR-2, ITGA6, Osteocalcin, Oct-3/4, FAK1, SOX2, IL-10, PAX8/PPARgamma fusion protein, Actin muscle, CD166, CD44, TGF-beta 3, TGF-beta 1, TNF-alpha, FGF10, Thy-1, Actin, Integrin, CD133, HNF1-alpha, BMP4, Beta-catenin | 1.036E-24 | GDF5, IL-1 beta, SMURF, alpha-6/beta-1 integrin, IFN-gamma, VEGF-A, HNF1, ITGAX, LIF, PDGF-R-beta, CD45, ITGB1, EGF, ACTA2, MGF, TGF-beta, G-CSF, Endoglin, PDGF receptor, SMURF1, MMP-2, BDNF, GDF7, ErbB2, 5'-NTD, IGF-1, VEGFR-2, ITGA6, VCAM1, CD13, FAK1, Actin muscle, WNT, CD166, CD44, TGF-beta 3, TGF-beta 1, TNF-alpha, FGF10, Thy-1, Actin, Integrin, SMAD4, CD133, HNF1-alpha, BMP4, WNT3A, Beta-catenin | 8.923E-30 | GDF5, IL-1 beta, SMURF, alpha-6/beta-1 integrin, Caspase-3, NGFR(TNFRSF16), IFN-gamma, VEGF-A, ITGAX, G3P2, RUNX2, HDAC1, Histone deacetylase class I, LIF, PDGF-R-beta, ITGB1, EGF, PPAR-gamma, ACTA2, MGF, TGF-beta, G-CSF, Endoglin, PDGF receptor, REX1, SMURF1, MMP-2, BDNF, GDF7, ErbB2, 5'-NTD, ITGA6, Osteocalcin, VCAM1, FAK1, IL-10, PAX8/PPARgamma fusion protein, Actin muscle, WNT, CD166, CD44, TGF-beta 3, TNF-alpha, TGF-beta 1, Thy-1, Actin, Integrin, CD133, TBX5, WNT3A, BMP7, Beta-catenin |
| cell differentiation                 | 9.206E-31 | 9.206E-31 | GDF5, BMP6, SMURF, Caspase-3, NGFR(TNFRSF16), IFN-gamma, COL1A1, HNF1, RUNX2, HDAC1,                                                                                                                                                                                                                                                                                                                                                                                                                                            | 5.854E-25 | GDF5, SMURF, alpha-6/beta-1 integrin, IFN-gamma, VEGF-A, HNF1, LIF, PDGF-R-beta,                                                                                                                                                                                                                                                                                                                                     | 8.981E-30 | GDF5, SMURF, alpha-6/beta-1 integrin, Caspase-3, NGFR(TNFRSF16), IFN-gamma, VEGF-A, RUNX2,                                                                                                                                                                                                                                                                                                                                                                                                                      |

|  |  |                                                                                                                                                                                                                                                                                                                                                                                      |                                                                                                                                                                                                                                                                                     |                                                                                                                                                                                                                                                                                                                                                                            |
|--|--|--------------------------------------------------------------------------------------------------------------------------------------------------------------------------------------------------------------------------------------------------------------------------------------------------------------------------------------------------------------------------------------|-------------------------------------------------------------------------------------------------------------------------------------------------------------------------------------------------------------------------------------------------------------------------------------|----------------------------------------------------------------------------------------------------------------------------------------------------------------------------------------------------------------------------------------------------------------------------------------------------------------------------------------------------------------------------|
|  |  | <p>Histone deacetylase class I, LIF, PDGF-R-beta, BMP2, HGF, PPAR-gamma, ACTA2, MGF, TGF-beta, G-CSF, Endoglin, PDGF receptor, REX1, SMURF1, MMP-2, BDNF, GDF7, ErbB2, IGF-1, VEGFR-2, ITGA6, Osteocalcin, Oct-3/4, FAK1, SOX2, IL-10, PAX8/PPARgamma fusion protein, Actin muscle, CD166, CD44, TGF-beta 1, TNF-alpha, FGF10, Thy-1, Actin, Integrin, CD133, BMP4, Beta-catenin</p> | <p>CD45, ITGB1, ACTA2, MGF, TGF-beta, G-CSF, Endoglin, PDGF receptor, SMURF1, MMP-2, BDNF, GDF7, ErbB2, IGF-1, VEGFR-2, ITGA6, VCAM1, CD13, FAK1, Actin muscle, WNT, CD166, CD44, TGF-beta 1, TNF-alpha, FGF10, Thy-1, Actin, Integrin, SMAD4, CD133, BMP4, WNT3A, Beta-catenin</p> | <p>HDAC1, Histone deacetylase class I, LIF, PDGF-R-beta, ITGB1, PPAR-gamma, ACTA2, MGF, TGF-beta, G-CSF, Endoglin, PDGF receptor, REX1, SMURF1, MMP-2, BDNF, GDF7, ErbB2, ITGA6, Osteocalcin, VCAM1, FAK1, IL-10, PAX8/PPARgamma fusion protein, Actin muscle, WNT, CD166, CD44, TNF-alpha, TGF-beta 1, Thy-1, Actin, Integrin, CD133, TBX5, WNT3A, BMP7, Beta-catenin</p> |
|--|--|--------------------------------------------------------------------------------------------------------------------------------------------------------------------------------------------------------------------------------------------------------------------------------------------------------------------------------------------------------------------------------------|-------------------------------------------------------------------------------------------------------------------------------------------------------------------------------------------------------------------------------------------------------------------------------------|----------------------------------------------------------------------------------------------------------------------------------------------------------------------------------------------------------------------------------------------------------------------------------------------------------------------------------------------------------------------------|
