# Supplementary material
Source: PubMed Central journal article supplement (PMC4096228)
Supplement: mp400573g_si_004.pdf [file mp400573g_si_004.pdf]

**Table S3: Go Processes for Day 36**

|                                                    |               | BMP-2     |                                                                                                                                                                                                                                                                                                                                                                                                                                                  | TGF-β1    |                                                                                                                                                                                                                                                                                                                                                                                                                                                                                           | BMP-2 and TGF-β1 |                                                                                                                                                                                                                                                                                                                                                                                                                                                        |
|----------------------------------------------------|---------------|-----------|--------------------------------------------------------------------------------------------------------------------------------------------------------------------------------------------------------------------------------------------------------------------------------------------------------------------------------------------------------------------------------------------------------------------------------------------------|-----------|-------------------------------------------------------------------------------------------------------------------------------------------------------------------------------------------------------------------------------------------------------------------------------------------------------------------------------------------------------------------------------------------------------------------------------------------------------------------------------------------|------------------|--------------------------------------------------------------------------------------------------------------------------------------------------------------------------------------------------------------------------------------------------------------------------------------------------------------------------------------------------------------------------------------------------------------------------------------------------------|
| Processes                                          | Min (p-Value) | p-value   | Genes from Active Data                                                                                                                                                                                                                                                                                                                                                                                                                           | p-value   | Genes from Active Data                                                                                                                                                                                                                                                                                                                                                                                                                                                                    | p-value          | Genes from Active Data                                                                                                                                                                                                                                                                                                                                                                                                                                 |
| regulation of multicellular organismal development | 2.749E-43     | 7.591E-39 | GDF5, BMP6, SMURF, NGFR(TNFRSF16), COL1A1, VEGF-A, HNF1, IL-6, RUNX2, HDAC1, FGF2, Histone deacetylase class I, LIF, PDGF-R-beta, BMP2, CD45, ITGB1, SOX9, HGF, PPAR-gamma, MGF, TGF-beta, Endoglin, PDGF receptor, alpha-V/beta-1 integrin, SMURF1, BDNF, GDF7, ErbB2, GDF6, IGF-1, VEGFR-2, Oct-3/4, SOX2, IL-10, PAX8/PPARgamma fusion protein, WNT, CD44, TNF-alpha, TGF-beta 1, Thy-1, GM-CSF, CD133, TBX5, BMP4, WNT3A, BMP7, Beta-catenin | 2.749E-43 | GDF5, BMP6, IL-1 beta, SMURF, NGFR(TNFRSF16), IFN-gamma, COL1A1, VEGF-A, HNF1, IL-6, RUNX2, HDAC1, FGF2, Histone deacetylase class I, LIF, PDGF-R-beta, BMP2, CD45, ITGB1, EGF, HGF, PPAR-gamma, MGF, TGF-beta, Frizzled, Notch, PDGF receptor, alpha-V/beta-1 integrin, NOTCH1 precursor, SMURF1, GDF7, ErbB2, GDF6, IGF-1, VEGFR-2, Oct-3/4, FAK1, SOX2, IL-10, PAX8/PPARgamma fusion protein, WNT, TGF-beta 3, TNF-alpha, TGF-beta 1, Thy-1, GM-CSF, Integrin, TBX5, BMP4, WNT3A, BMP7 | 1.317E-38        | GDF5, BMP6, SMURF, NGFR(TNFRSF16), IFN-gamma, COL1A1, VEGF-A, HNF1, IL-6, RUNX2, HDAC1, FGF2, Histone deacetylase class I, PDGF-R-beta, BMP2, ITGB1, HGF, PPAR-gamma, TGF-beta, Endoglin, PDGF receptor, alpha-V/beta-1 integrin, SMURF1, BDNF, GDF7, ErbB2, GDF6, IGF-1, VEGFR-2, Osteocalcin, Oct-3/4, FAK1, SOX2, PAX8/PPARgamma fusion protein, WNT, CD44, TGF-beta 3, TGF-beta 1, Thy-1, GM-CSF, Integrin, CD133, BMP4, WNT3A, BMP7, Beta-catenin |
| regulation of developmental process                | 2.351E-41     | 4.551E-37 | GDF5, BMP6, SMURF, NGFR(TNFRSF16), COL1A1, VEGF-A, HNF1, IL-6, RUNX2, HDAC1, FGF2, Histone deacetylase class I, LIF, PDGF-R-beta, BMP2, CD45, ITGB1, SOX9, HGF, PPAR-gamma, MGF, TGF-beta, Endoglin, PDGF receptor, alpha-                                                                                                                                                                                                                       | 2.351E-41 | GDF5, BMP6, IL-1 beta, SMURF, NGFR(TNFRSF16), IFN-gamma, COL1A1, VEGF-A, HNF1, IL-6, RUNX2, HDAC1, FGF2, Histone deacetylase class I, LIF, PDGF-R-beta, BMP2, CD45, ITGB1, EGF, HGF, PPAR-gamma, MGF, TGF-beta, Frizzled, Notch, PDGF receptor,                                                                                                                                                                                                                                           | 4.088E-37        | GDF5, BMP6, SMURF, NGFR(TNFRSF16), IFN-gamma, COL1A1, VEGF-A, HNF1, IL-6, RUNX2, HDAC1, FGF2, Histone deacetylase class I, PDGF-R-beta, BMP2, ITGB1, HGF, PPAR-gamma, TGF-beta, Endoglin, PDGF receptor, alpha-V/beta-1 integrin,                                                                                                                                                                                                                      |

|                   |           |           |                                                                                                                                                                                                                                                                                                                                                                                                                                                                                                                                              |           |                                                                                                                                                                                                                                                                                                                                                                                                                                                                                                                                                                             |           |                                                                                                                                                                                                                                                                                                                                                                                                                                                                                                                                                             |
|-------------------|-----------|-----------|----------------------------------------------------------------------------------------------------------------------------------------------------------------------------------------------------------------------------------------------------------------------------------------------------------------------------------------------------------------------------------------------------------------------------------------------------------------------------------------------------------------------------------------------|-----------|-----------------------------------------------------------------------------------------------------------------------------------------------------------------------------------------------------------------------------------------------------------------------------------------------------------------------------------------------------------------------------------------------------------------------------------------------------------------------------------------------------------------------------------------------------------------------------|-----------|-------------------------------------------------------------------------------------------------------------------------------------------------------------------------------------------------------------------------------------------------------------------------------------------------------------------------------------------------------------------------------------------------------------------------------------------------------------------------------------------------------------------------------------------------------------|
|                   |           |           | V/beta-1 integrin, SMURF1, BDNF, GDF7, ErbB2, GDF6, IGF-1, VEGFR-2, Oct-3/4, SOX2, IL-10, PAX8/PPARgamma fusion protein, WNT, ICAM1, CD44, TNF-alpha, TGF-beta 1, Thy-1, GM-CSF, CD133, TBX5, BMP4, WNT3A, BMP7, Beta-catenin, ITGAV                                                                                                                                                                                                                                                                                                         |           | alpha-V/beta-1 integrin, NOTCH1 precursor, SMURF1, GDF7, ErbB2, GDF6, IGF-1, VEGFR-2, Oct-3/4, FAK1, SOX2, IL-10, PAX8/PPARgamma fusion protein, WNT, ICAM1, TGF-beta 3, TNF-alpha, TGF-beta 1, Thy-1, GM-CSF, Integrin, TBX5, BMP4, WNT3A, BMP7, ITGAV                                                                                                                                                                                                                                                                                                                     |           | SMURF1, BDNF, GDF7, ErbB2, GDF6, IGF-1, VEGFR-2, Osteocalcin, Oct-3/4, FAK1, SOX2, PAX8/PPARgamma fusion protein, WNT, ICAM1, CD44, TGF-beta 3, TGF-beta 1, Thy-1, GM-CSF, Integrin, CD133, BMP4, WNT3A, BMP7, Beta-catenin, ITGAV                                                                                                                                                                                                                                                                                                                          |
| organ development | 5.183E-41 | 4.294E-38 | GDF5, BMP6, Caspase-3, NGFR(TNFRSF16), COL1A1, VEGF-A, HNF1, IL-6, RUNX2, HDAC1, FGF2, Histone deacetylase class I, LIF, PDGF-R-beta, BMP2, CD45, ITGB1, SOX9, HGF, PPAR-gamma, ACTA2, MGF, TGF-beta, Endoglin, PDGF receptor, alpha-V/beta-1 integrin, REX1, MMP-2, BDNF, GDF7, ErbB2, MDR1, 5'-NTD, IGF-1, VEGFR-2, Oct-3/4, VCAM1, HPRT, SOX2, IL-10, PAX8/PPARgamma fusion protein, Actin muscle, WNT, ICAM1, CD44, TNF-alpha, TGF-beta 1, Thy-1, GM-CSF, Actin, Nestin, CD133, TBX5, HNF1-alpha, BMP4, WNT3A, BMP7, Beta-catenin, ITGAV | 5.183E-41 | GDF5, BMP6, Caspase-3, NGFR(TNFRSF16), IFN-gamma, COL1A1, VEGF-A, HNF1, ITGAX, IL-6, RUNX2, HDAC1, FGF2, Histone deacetylase class I, LIF, PDGF-R-beta, BMP2, CD45, ITGB1, EGF, HGF, PPAR-gamma, ACTA2, MGF, TGF-beta, Frizzled, Notch, FZD9, PDGF receptor, alpha-V/beta-1 integrin, NOTCH1 precursor, MMP-2, GDF7, ErbB2, MDR1, 5'-NTD, IGF-1, VEGFR-2, Oct-3/4, VCAM1, FAK1, SOX2, IL-10, PAX8/PPARgamma fusion protein, Actin muscle, WNT, ICAM1, TGF-beta 3, TNF-alpha, TGF-beta 1, Thy-1, GM-CSF, Actin, Nestin, Integrin, TBX5, HNF1-alpha, BMP4, WNT3A, BMP7, ITGAV | 9.266E-38 | GDF5, BMP6, Caspase-3, NGFR(TNFRSF16), IFN-gamma, COL1A1, VEGF-A, HNF1, ITGAX, IL-6, RUNX2, HDAC1, FGF2, Histone deacetylase class I, PDGF-R-beta, BMP2, ITGB1, HGF, PPAR-gamma, ACTA2, TGF-beta, von Willebrand factor, Endoglin, PDGF receptor, alpha-V/beta-1 integrin, REX1, MMP-2, BDNF, GDF7, ErbB2, MDR1, IGF-1, VEGFR-2, Osteocalcin, Oct-3/4, FAK1, SOX2, PAX8/PPARgamma fusion protein, Actin muscle, WNT, ICAM1, CD44, TGF-beta 3, TGF-beta 1, Thy-1, GM-CSF, Actin, Nestin, Integrin, CD133, HNF1-alpha, BMP4, WNT3A, BMP7, Beta-catenin, ITGAV |

|                    |           |           |                                                                                                                                                                                                                                                                                                                                                                                                                                                                       |           |                                                                                                                                                                                                                                                                                                                                                                                                                                                               |           |                                                                                                                                                                                                                                                                                                                                                                                                                                                                       |
|--------------------|-----------|-----------|-----------------------------------------------------------------------------------------------------------------------------------------------------------------------------------------------------------------------------------------------------------------------------------------------------------------------------------------------------------------------------------------------------------------------------------------------------------------------|-----------|---------------------------------------------------------------------------------------------------------------------------------------------------------------------------------------------------------------------------------------------------------------------------------------------------------------------------------------------------------------------------------------------------------------------------------------------------------------|-----------|-----------------------------------------------------------------------------------------------------------------------------------------------------------------------------------------------------------------------------------------------------------------------------------------------------------------------------------------------------------------------------------------------------------------------------------------------------------------------|
| tissue development | 3.247E-40 | 3.247E-40 | GDF5, BMP6, SMURF, Caspase-3, NGFR(TNFRSF16), COL1A1, VEGF-A, HNF1, IL-6, RUNX2, HDAC1, FGF2, Histone deacetylase class I, LIF, PDGF-R-beta, BMP2, ITGB1, SOX9, HGF, PPAR-gamma, ACTA2, MGF, TGF-beta, Endoglin, PDGF receptor, alpha-V/beta-1 integrin, SMURF1, MMP-2, GDF7, ErbB2, IGF-1, VEGFR-2, Oct-3/4, VCAM1, SOX2, IL-10, PAX8/PPARgamma fusion protein, Actin muscle, WNT, CD44, TGF-beta 1, Actin, CD133, TBX5, HNF1-alpha, BMP4, WNT3A, BMP7, Beta-catenin | 2.444E-37 | GDF5, BMP6, SMURF, Caspase-3, NGFR(TNFRSF16), COL1A1, VEGF-A, HNF1, IL-6, RUNX2, HDAC1, FGF2, Histone deacetylase class I, LIF, PDGF-R-beta, BMP2, ITGB1, HGF, PPAR-gamma, ACTA2, MGF, TGF-beta, Frizzled, Notch, PDGF receptor, alpha-V/beta-1 integrin, NOTCH1 precursor, SMURF1, MMP-2, GDF7, ErbB2, IGF-1, VEGFR-2, Oct-3/4, VCAM1, SOX2, IL-10, PAX8/PPARgamma fusion protein, Actin muscle, WNT, TGF-beta 1, Actin, TBX5, HNF1-alpha, BMP4, WNT3A, BMP7 | 4.761E-37 | GDF5, BMP6, SMURF, Caspase-3, NGFR(TNFRSF16), COL1A1, VEGF-A, HNF1, IL-6, RUNX2, HDAC1, FGF2, Histone deacetylase class I, PDGF-R-beta, BMP2, ITGB1, HGF, PPAR-gamma, ACTA2, TGF-beta, von Willebrand factor, Endoglin, PDGF receptor, alpha-V/beta-1 integrin, SMURF1, MMP-2, GDF7, ErbB2, IGF-1, VEGFR-2, Osteocalcin, Oct-3/4, SOX2, PAX8/PPARgamma fusion protein, Actin muscle, WNT, CD44, TGF-beta 1, Actin, CD133, HNF1-alpha, BMP4, WNT3A, BMP7, Beta-catenin |
| system development | 4.034E-40 | 4.034E-40 | GDF5, BMP6, SMURF, Caspase-3, NGFR(TNFRSF16), COL1A1, VEGF-A, HNF1, IL-6, RUNX2, HDAC1, FGF2, Histone deacetylase class I, LIF, PDGF-R-beta, BMP2, CD45, ITGB1, SOX9, HGF, PPAR-gamma, ACTA2, MGF, TGF-beta, Actin cytoskeletal, Endoglin, PDGF receptor, alpha-V/beta-1 integrin, REX1, SMURF1, ACTB, MMP-2, BDNF, GDF7, ErbB2, MDR1, GDF6, 5'-NTD, IGF-1, VEGFR-2, Oct-3/4, VCAM1,                                                                                  | 4.620E-37 | GDF5, BMP6, SMURF, Caspase-3, NGFR(TNFRSF16), IFN-gamma, COL1A1, VEGF-A, HNF1, ITGAX, IL-6, RUNX2, HDAC1, FGF2, Histone deacetylase class I, LIF, PDGF-R-beta, BMP2, CD45, ITGB1, EGF, HGF, PPAR-gamma, ACTA2, MGF, TGF-beta, Frizzled, Notch, FZD9, PDGF receptor, alpha-V/beta-1 integrin, NOTCH1 precursor, SMURF1, MMP-2, GDF7, ErbB2, MDR1, GDF6, 5'-NTD, IGF-1, VEGFR-2, Oct-3/4,                                                                       | 1.348E-37 | GDF5, BMP6, SMURF, Caspase-3, NGFR(TNFRSF16), IFN-gamma, COL1A1, VEGF-A, HNF1, ITGAX, IL-6, RUNX2, HDAC1, FGF2, Histone deacetylase class I, PDGF-R-beta, BMP2, ITGB1, HGF, PPAR-gamma, ACTA2, TGF-beta, von Willebrand factor, Endoglin, PDGF receptor, alpha-V/beta-1 integrin, REX1, SMURF1, MMP-2, BDNF, GDF7, ErbB2, MDR1, GDF6, IGF-1, VEGFR-2, Osteocalcin, Oct-                                                                                               |

|                      |           |           |                                                                                                                                                                                                                                                                                                                                                                                                                                                                                                                                                                   |           |                                                                                                                                                                                                                                                                                                                                                                                                                                                                                                                                         |           |                                                                                                                                                                                                                                                                                                                                                                                                                                                                                                                      |
|----------------------|-----------|-----------|-------------------------------------------------------------------------------------------------------------------------------------------------------------------------------------------------------------------------------------------------------------------------------------------------------------------------------------------------------------------------------------------------------------------------------------------------------------------------------------------------------------------------------------------------------------------|-----------|-----------------------------------------------------------------------------------------------------------------------------------------------------------------------------------------------------------------------------------------------------------------------------------------------------------------------------------------------------------------------------------------------------------------------------------------------------------------------------------------------------------------------------------------|-----------|----------------------------------------------------------------------------------------------------------------------------------------------------------------------------------------------------------------------------------------------------------------------------------------------------------------------------------------------------------------------------------------------------------------------------------------------------------------------------------------------------------------------|
|                      |           |           | HPRT, SOX2, IL-10, PAX8/PPARgamma fusion protein, Actin muscle, WNT, ICAM1, CD166, CD44, TNF-alpha, TGF-beta 1, MCAM, Thy-1, GM-CSF, Actin, Nestin, CD133, TBX5, HNF1-alpha, BMP4, WNT3A, BMP7, Beta-catenin, ITGAV                                                                                                                                                                                                                                                                                                                                               |           | VCAM1, FAK1, SOX2, IL-10, PAX8/PPARgamma fusion protein, Actin muscle, WNT, ICAM1, TGF-beta 3, TNF-alpha, TGF-beta 1, Thy-1, GM-CSF, Actin, Nestin, Integrin, TBX5, HNF1-alpha, BMP4, WNT3A, BMP7, ITGAV                                                                                                                                                                                                                                                                                                                                |           | 3/4, FAK1, SOX2, PAX8/PPARgamma fusion protein, Actin muscle, WNT, ICAM1, CD166, CD44, TGF-beta 3, TGF-beta 1, MCAM, Thy-1, GM-CSF, Actin, Nestin, Integrin, CD133, HNF1-alpha, BMP4, WNT3A, BMP7, Beta-catenin, ITGAV                                                                                                                                                                                                                                                                                               |
| cell differentiation | 6.026E-40 | 6.026E-40 | GDF5, BMP6, SMURF, Caspase-3, NGFR(TNFRSF16), COL1A1, VEGF-A, HNF1, IL-6, RUNX2, HDAC1, FGF2, Histone deacetylase class I, LIF, PDGF-R-beta, BMP2, CD45, ITGB1, SOX9, HGF, PPAR-gamma, ACTA2, MGF, TGF-beta, Actin cytoskeletal, Endoglin, PDGF receptor, alpha-V/beta-1 integrin, REX1, SMURF1, ACTB, MMP-2, BDNF, GDF7, ErbB2, GDF6, IGF-1, VEGFR-2, Oct-3/4, VCAM1, HPRT, SOX2, IL-10, PAX8/PPARgamma fusion protein, Actin muscle, WNT, CD166, CD44, TNF-alpha, TGF-beta 1, Thy-1, GM-CSF, Actin, Nestin, CD133, TBX5, BMP4, WNT3A, BMP7, Beta-catenin, ITGAV | 2.414E-34 | GDF5, BMP6, SMURF, Caspase-3, NGFR(TNFRSF16), IFN-gamma, COL1A1, VEGF-A, HNF1, IL-6, RUNX2, HDAC1, FGF2, Histone deacetylase class I, LIF, PDGF-R-beta, BMP2, CD45, ITGB1, HGF, PPAR-gamma, ACTA2, MGF, TGF-beta, Frizzled, Notch, FZD9, PDGF receptor, alpha-V/beta-1 integrin, NOTCH1 precursor, SMURF1, MMP-2, GDF7, ErbB2, GDF6, IGF-1, VEGFR-2, Oct-3/4, VCAM1, FAK1, SOX2, IL-10, PAX8/PPARgamma fusion protein, Actin muscle, WNT, TNF-alpha, TGF-beta 1, Thy-1, GM-CSF, Actin, Nestin, Integrin, TBX5, BMP4, WNT3A, BMP7, ITGAV | 6.477E-34 | GDF5, BMP6, SMURF, Caspase-3, NGFR(TNFRSF16), IFN-gamma, COL1A1, VEGF-A, HNF1, IL-6, RUNX2, HDAC1, FGF2, Histone deacetylase class I, PDGF-R-beta, BMP2, ITGB1, HGF, PPAR-gamma, ACTA2, TGF-beta, Endoglin, PDGF receptor, alpha-V/beta-1 integrin, REX1, SMURF1, MMP-2, BDNF, GDF7, ErbB2, GDF6, IGF-1, VEGFR-2, Osteocalcin, Oct-3/4, FAK1, SOX2, PAX8/PPARgamma fusion protein, Actin muscle, WNT, CD166, CD44, TGF-beta 1, Thy-1, GM-CSF, Actin, Nestin, Integrin, CD133, BMP4, WNT3A, BMP7, Beta-catenin, ITGAV |

|                                    |           |           |                                                                                                                                                                                                                                                                                                                                                                                                                                                                                                                                                                   |           |                                                                                                                                                                                                                                                                                                                                                                                                                                                                                                                                         |           |                                                                                                                                                                                                                                                                                                                                                                                                                                                                                                                      |
|------------------------------------|-----------|-----------|-------------------------------------------------------------------------------------------------------------------------------------------------------------------------------------------------------------------------------------------------------------------------------------------------------------------------------------------------------------------------------------------------------------------------------------------------------------------------------------------------------------------------------------------------------------------|-----------|-----------------------------------------------------------------------------------------------------------------------------------------------------------------------------------------------------------------------------------------------------------------------------------------------------------------------------------------------------------------------------------------------------------------------------------------------------------------------------------------------------------------------------------------|-----------|----------------------------------------------------------------------------------------------------------------------------------------------------------------------------------------------------------------------------------------------------------------------------------------------------------------------------------------------------------------------------------------------------------------------------------------------------------------------------------------------------------------------|
| cellular developmental process     | 3.957E-39 | 3.957E-39 | GDF5, BMP6, SMURF, Caspase-3, NGFR(TNFRSF16), COL1A1, VEGF-A, HNF1, IL-6, RUNX2, HDAC1, FGF2, Histone deacetylase class I, LIF, PDGF-R-beta, BMP2, CD45, ITGB1, SOX9, HGF, PPAR-gamma, ACTA2, MGF, TGF-beta, Actin cytoskeletal, Endoglin, PDGF receptor, alpha-V/beta-1 integrin, REX1, SMURF1, ACTB, MMP-2, BDNF, GDF7, ErbB2, GDF6, IGF-1, VEGFR-2, Oct-3/4, VCAM1, HPRT, SOX2, IL-10, PAX8/PPARgamma fusion protein, Actin muscle, WNT, CD166, CD44, TNF-alpha, TGF-beta 1, Thy-1, GM-CSF, Actin, Nestin, CD133, TBX5, BMP4, WNT3A, BMP7, Beta-catenin, ITGAV | 1.365E-33 | GDF5, BMP6, SMURF, Caspase-3, NGFR(TNFRSF16), IFN-gamma, COL1A1, VEGF-A, HNF1, IL-6, RUNX2, HDAC1, FGF2, Histone deacetylase class I, LIF, PDGF-R-beta, BMP2, CD45, ITGB1, HGF, PPAR-gamma, ACTA2, MGF, TGF-beta, Frizzled, Notch, FZD9, PDGF receptor, alpha-V/beta-1 integrin, NOTCH1 precursor, SMURF1, MMP-2, GDF7, ErbB2, GDF6, IGF-1, VEGFR-2, Oct-3/4, VCAM1, FAK1, SOX2, IL-10, PAX8/PPARgamma fusion protein, Actin muscle, WNT, TNF-alpha, TGF-beta 1, Thy-1, GM-CSF, Actin, Nestin, Integrin, TBX5, BMP4, WNT3A, BMP7, ITGAV | 3.378E-33 | GDF5, BMP6, SMURF, Caspase-3, NGFR(TNFRSF16), IFN-gamma, COL1A1, VEGF-A, HNF1, IL-6, RUNX2, HDAC1, FGF2, Histone deacetylase class I, PDGF-R-beta, BMP2, ITGB1, HGF, PPAR-gamma, ACTA2, TGF-beta, Endoglin, PDGF receptor, alpha-V/beta-1 integrin, REX1, SMURF1, MMP-2, BDNF, GDF7, ErbB2, GDF6, IGF-1, VEGFR-2, Osteocalcin, Oct-3/4, FAK1, SOX2, PAX8/PPARgamma fusion protein, Actin muscle, WNT, CD166, CD44, TGF-beta 1, Thy-1, GM-CSF, Actin, Nestin, Integrin, CD133, BMP4, WNT3A, BMP7, Beta-catenin, ITGAV |
| anatomical structure morphogenesis | 6.141E-39 | 6.141E-39 | GDF5, BMP6, NGFR(TNFRSF16), COL1A1, VEGF-A, HNF1, IL-6, RUNX2, HDAC1, FGF2, Histone deacetylase class I, LIF, PDGF-R-beta, BMP2, CD45, ITGB1, SOX9, HGF, PPAR-gamma, TGF-beta, Actin cytoskeletal, Endoglin, PDGF receptor, alpha-V/beta-1 integrin, ACTB, MMP-2, BDNF, GDF7,                                                                                                                                                                                                                                                                                     | 8.130E-35 | GDF5, BMP6, NGFR(TNFRSF16), COL1A1, VEGF-A, HNF1, ITGAX, IL-6, RUNX2, HDAC1, FGF2, Histone deacetylase class I, LIF, PDGF-R-beta, BMP2, CD45, ITGB1, EGF, HGF, PPAR-gamma, TGF-beta, Frizzled, Notch, PDGF receptor, alpha-V/beta-1 integrin, NOTCH1 precursor, MMP-2, GDF7, ErbB2, IGF-                                                                                                                                                                                                                                                | 1.394E-36 | GDF5, BMP6, NGFR(TNFRSF16), COL1A1, VEGF-A, HNF1, ITGAX, IL-6, RUNX2, HDAC1, FGF2, Histone deacetylase class I, PDGF-R-beta, BMP2, ITGB1, HGF, PPAR-gamma, TGF-beta, von Willebrand factor, Endoglin, PDGF receptor, alpha-V/beta-1 integrin, MMP-2, BDNF, GDF7, ErbB2, IGF-                                                                                                                                                                                                                                         |

|                                                |           |           |                                                                                                                                                                                                                                                                                                                                                                                                                |           |                                                                                                                                                                                                                                                                                                                                                                                                                                               |           |                                                                                                                                                                                                                                                                                                                                                                                                                   |
|------------------------------------------------|-----------|-----------|----------------------------------------------------------------------------------------------------------------------------------------------------------------------------------------------------------------------------------------------------------------------------------------------------------------------------------------------------------------------------------------------------------------|-----------|-----------------------------------------------------------------------------------------------------------------------------------------------------------------------------------------------------------------------------------------------------------------------------------------------------------------------------------------------------------------------------------------------------------------------------------------------|-----------|-------------------------------------------------------------------------------------------------------------------------------------------------------------------------------------------------------------------------------------------------------------------------------------------------------------------------------------------------------------------------------------------------------------------|
|                                                |           |           | ErbB2, IGF-1, VEGFR-2, Oct-3/4, VCAM1, HPRT, SOX2, IL-10, PAX8/PPARgamma fusion protein, Actin muscle, WNT, CD166, CD44, TNF-alpha, TGF-beta 1, MCAM, Thy-1, Actin, Nestin, CD133, TBX5, HNF1-alpha, BMP4, WNT3A, BMP7, Beta-catenin, ITGAV                                                                                                                                                                    |           | 1, VEGFR-2, Oct-3/4, VCAM1, FAK1, SOX2, IL-10, PAX8/PPARgamma fusion protein, Actin muscle, WNT, TGF-beta 3, TNF-alpha, TGF-beta 1, Thy-1, Actin, Nestin, Integrin, TBX5, HNF1-alpha, BMP4, WNT3A, BMP7, ITGAV                                                                                                                                                                                                                                |           | 1, VEGFR-2, Osteocalcin, Oct-3/4, FAK1, SOX2, PAX8/PPARgamma fusion protein, Actin muscle, WNT, CD166, CD44, TGF-beta 3, TGF-beta 1, MCAM, Thy-1, Actin, Nestin, Integrin, CD133, HNF1-alpha, BMP4, WNT3A, BMP7, Beta-catenin, ITGAV                                                                                                                                                                              |
| regulation of cell differentiation             | 2.584E-38 | 1.783E-35 | GDF5, BMP6, SMURF, NGFR(TNFRSF16), COL1A1, VEGF-A, HNF1, IL-6, RUNX2, HDAC1, FGF2, Histone deacetylase class I, LIF, BMP2, CD45, ITGB1, SOX9, PPAR-gamma, MGF, TGF-beta, PDGF receptor, alpha-V/beta-1 integrin, SMURF1, BDNF, GDF7, ErbB2, GDF6, IGF-1, VEGFR-2, Oct-3/4, SOX2, PAX8/PPARgamma fusion protein, WNT, TNF-alpha, TGF-beta 1, Thy-1, GM-CSF, CD133, TBX5, BMP4, WNT3A, BMP7, Beta-catenin, ITGAV | 2.584E-38 | GDF5, BMP6, SMURF, NGFR(TNFRSF16), IFN-gamma, COL1A1, VEGF-A, HNF1, IL-6, RUNX2, HDAC1, FGF2, Histone deacetylase class I, LIF, BMP2, CD45, ITGB1, PPAR-gamma, MGF, TGF-beta, Frizzled, Notch, PDGF receptor, alpha-V/beta-1 integrin, NOTCH1 precursor, SMURF1, GDF7, ErbB2, GDF6, IGF-1, VEGFR-2, Oct-3/4, FAK1, SOX2, PAX8/PPARgamma fusion protein, WNT, TGF-beta 3, TNF-alpha, TGF-beta 1, Thy-1, GM-CSF, TBX5, BMP4, WNT3A, BMP7, ITGAV | 5.987E-35 | GDF5, BMP6, SMURF, NGFR(TNFRSF16), IFN-gamma, COL1A1, VEGF-A, HNF1, IL-6, RUNX2, HDAC1, FGF2, Histone deacetylase class I, BMP2, ITGB1, PPAR-gamma, TGF-beta, PDGF receptor, alpha-V/beta-1 integrin, SMURF1, BDNF, GDF7, ErbB2, GDF6, IGF-1, VEGFR-2, Osteocalcin, Oct-3/4, FAK1, SOX2, PAX8/PPARgamma fusion protein, WNT, TGF-beta 3, TGF-beta 1, Thy-1, GM-CSF, CD133, BMP4, WNT3A, BMP7, Beta-catenin, ITGAV |
| regulation of multicellular organismal process | 1.423E-37 | 7.457E-35 | GDF5, BMP6, Annexin V, SMURF, NGFR(TNFRSF16), COL1A1, VEGF-A, HNF1, IL-6, RUNX2, HDAC1, FGF2, Histone deacetylase class I, LIF, PDGF-R-beta,                                                                                                                                                                                                                                                                   | 1.423E-37 | GDF5, BMP6, IL-1 beta, SMURF, NGFR(TNFRSF16), IFN-gamma, COL1A1, VEGF-A, HNF1, IL-6, RUNX2, HDAC1, FGF2, Histone deacetylase class I, LIF, PDGF-R-beta,                                                                                                                                                                                                                                                                                       | 8.185E-34 | GDF5, BMP6, SMURF, NGFR(TNFRSF16), IFN-gamma, COL1A1, VEGF-A, HNF1, IL-6, RUNX2, HDAC1, FGF2, Histone deacetylase class I, PDGF-R-beta,                                                                                                                                                                                                                                                                           |

|  |  |  |                                                                                                                                                                                                                                                                                                                                            |  |                                                                                                                                                                                                                                                                                                                                                               |  |                                                                                                                                                                                                                                                                                                                                            |
|--|--|--|--------------------------------------------------------------------------------------------------------------------------------------------------------------------------------------------------------------------------------------------------------------------------------------------------------------------------------------------|--|---------------------------------------------------------------------------------------------------------------------------------------------------------------------------------------------------------------------------------------------------------------------------------------------------------------------------------------------------------------|--|--------------------------------------------------------------------------------------------------------------------------------------------------------------------------------------------------------------------------------------------------------------------------------------------------------------------------------------------|
|  |  |  | <p>BMP2, CD45, ITGB1, SOX9, HGF, PPAR-gamma, MGF, TGF-beta, Endoglin, PDGF receptor, alpha-V/beta-1 integrin, SMURF1, MMP-2, BDNF, GDF7, ErbB2, GDF6, IGF-1, VEGFR-2, Oct-3/4, SOX2, IL-10, PAX8/PPARgamma fusion protein, WNT, ICAM1, CD44, TNF-alpha, TGF-beta 1, Thy-1, GM-CSF, CD133, TBX5, BMP4, WNT3A, BMP7, Beta-catenin, ITGAV</p> |  | <p>BMP2, CD45, ITGB1, EGF, HGF, PPAR-gamma, MGF, TGF-beta, Frizzled, Notch, PDGF receptor, alpha-V/beta-1 integrin, NOTCH1 precursor, SMURF1, MMP-2, GDF7, ErbB2, GDF6, IGF-1, VEGFR-2, Oct-3/4, FAK1, SOX2, IL-10, PAX8/PPARgamma fusion protein, WNT, ICAM1, TGF-beta 3, TNF-alpha, TGF-beta 1, Thy-1, GM-CSF, Integrin, TBX5, BMP4, WNT3A, BMP7, ITGAV</p> |  | <p>BMP2, ITGB1, HGF, PPAR-gamma, TGF-beta, Endoglin, PDGF receptor, alpha-V/beta-1 integrin, SMURF1, MMP-2, BDNF, GDF7, ErbB2, GDF6, IGF-1, VEGFR-2, Osteocalcin, Oct-3/4, FAK1, SOX2, PAX8/PPARgamma fusion protein, WNT, ICAM1, CD44, TGF-beta 3, TGF-beta 1, Thy-1, GM-CSF, Integrin, CD133, BMP4, WNT3A, BMP7, Beta-catenin, ITGAV</p> |
|--|--|--|--------------------------------------------------------------------------------------------------------------------------------------------------------------------------------------------------------------------------------------------------------------------------------------------------------------------------------------------|--|---------------------------------------------------------------------------------------------------------------------------------------------------------------------------------------------------------------------------------------------------------------------------------------------------------------------------------------------------------------|--|--------------------------------------------------------------------------------------------------------------------------------------------------------------------------------------------------------------------------------------------------------------------------------------------------------------------------------------------|
