# Supplementary material
Source: PubMed Central journal article supplement (PMC4096228)
Supplement: mp400573g_si_005.pdf [file mp400573g_si_005.pdf]

**Table S4: Pathway Maps for Day 14**

|                                                                           |               | BMP-2     |                                                                        | TGF- $\beta$ 1 |                                                                        | BMP-2 and TGF- $\beta$ 1 |                                                                           |
|---------------------------------------------------------------------------|---------------|-----------|------------------------------------------------------------------------|----------------|------------------------------------------------------------------------|--------------------------|---------------------------------------------------------------------------|
| Maps                                                                      | Min (p-value) | p-value   | Genes from Active Data                                                 | p-value        | Genes from Active Data                                                 | p-value                  | Genes from Active Data                                                    |
| Development_MAG-dependent inhibition of neurite outgrowth                 | 3.119E-09     | 1.022E-05 | NGFR(TNFRSF16), BDNF, NGFR (ICD), NGFR (CTF)                           | 3.119E-09      | NGFR(TNFRSF16), Actin cytoskeletal, BDNF, NGFR (ICD), NGFR (CTF), RhoA | 8.435E-04                | NGFR(TNFRSF16), NGFR (ICD), NGFR (CTF)                                    |
| Development_Regulation of epithelial-to-mesenchymal transition (EMT)      | 2.641E-08     | 3.643E-06 | IL-1 beta, PDGF-R-beta, Frizzled, NOTCH1 receptor, TGF-beta 3          | 1.597E-03      | ACTB, MMP-2, TGF-beta 3                                                | 2.641E-08                | IL-1 beta, ACTA2, Frizzled, MMP-2, NOTCH1 receptor, TGF-beta 3, TNF-alpha |
| Cell adhesion_Role of tetraspanins in the integrin-mediated cell adhesion | 1.895E-07     | 8.506E-03 | alpha-6/beta-1 integrin, ITGB1                                         | 1.895E-07      | alpha-6/beta-1 integrin, ITGB1, Actin cytoskeletal, Actin, RhoA        | 8.435E-04                | ITGB1, FAK1, Actin                                                        |
| Development_Notch Signaling Pathway                                       | 4.865E-07     | 4.865E-07 | HDAC1, NOTCH1 (NICD), NOTCH1 (NEXT), NOTCH1 precursor, NOTCH1 receptor | 1.464E-01      | HDAC1                                                                  | 2.231E-06                | NOTCH1 (NICD), NOTCH1 (NEXT), NOTCH1 precursor, NOTCH1 receptor, PCAF     |
| Development_TGF-beta-dependent induction of EMT via RhoA, PI3K and ILK.   | 5.822E-07     | 1.294E-02 | TGF-beta 3, Beta-catenin                                               | 5.822E-07      | ACTB, TGF-beta 3, Actin, Beta-catenin, RhoA                            | 3.142E-06                | ACTA2, SMURF1, TGF-beta 3, Actin, Beta-catenin                            |
| Cell adhesion_Chemokines and adhesion                                     | 1.362E-06     | 6.205E-03 | VEGF-A, VEGFR-2, Beta-catenin                                          | 1.362E-06      | Actin cytoskeletal, MMP-2, VEGFR-2, Actin, Beta-catenin, RhoA          | 1.006E-05                | MMP-2, VEGFR-2, FAK1, CD44, Actin, Beta-catenin                           |
| Development_TGF-beta-dependent induction of EMT via MAPK                  | 3.503E-06     | 7.127E-04 | ITGB1, TGF-beta, TGF-beta 3                                            | 2.361E-05      | ITGB1, TGF-beta, MMP-2, TGF-beta 3                                     | 3.503E-06                | ITGB1, TGF-beta, MMP-2, FAK1, TGF-beta 3                                  |
| Chemotaxis_Leukocyte chemotaxis                                           | 6.804E-06     | 3.243E-02 | ITGB1, VCAM1                                                           | 6.804E-06      | ITGB1, Actin cytoskeletal, VCAM1, Actin, RhoA                          | 6.411E-03                | ITGB1, VCAM1, Actin                                                       |
| Development_NOTCH1-mediated pathway for NF-KB activity modulation         | 7.231E-06     | 7.231E-06 | HDAC1, NOTCH1 (NICD), NOTCH1 (NEXT), NOTCH1 receptor                   | 1.176E-01      | HDAC1                                                                  | 2.405E-05                | NOTCH1 (NICD), NOTCH1 (NEXT), NOTCH1 receptor, PCAF                       |
| Transcription_Role of VDR in regulation of genes involved in osteoporosis | 1.289E-05     | 1.526E-03 | IL-1 beta, IGF-1, Osteocalcin                                          | 1.390E-03      | RUNX2, IGF-1, Osteocalcin                                              | 1.289E-05                | IL-1 beta, IFN-gamma, IGF-1, Osteocalcin, TNF-alpha                       |
