# Supplementary material
Source: PubMed Central journal article supplement (PMC4096228)
Supplement: mp400573g_si_006.pdf [file mp400573g_si_006.pdf]

**Table S5: Pathway maps for Day 21**

|                                                                            |               | BMP-2     |                                                                                   | TGF-β1    |                                                                                   | BMP-2 and TGF-β1 |                                                                                   |
|----------------------------------------------------------------------------|---------------|-----------|-----------------------------------------------------------------------------------|-----------|-----------------------------------------------------------------------------------|------------------|-----------------------------------------------------------------------------------|
| Maps                                                                       | Min (p-Value) | p-value   | Genes from Active Data                                                            | p-value   | Genes from Active Data                                                            | p-value          | Genes from Active Data                                                            |
| Development_Regulation of epithelial-to-mesenchymal transition (EMT)       | 7.960E-12     | 3.099E-11 | IL-1 beta, PDGF-R-beta, EGF, HGF, ACTA2, MMP-2, TGF-beta 3, TGF-beta 1, TNF-alpha | 7.960E-12 | IL-1 beta, PDGF-R-beta, EGF, ACTA2, MMP-2, WNT, TGF-beta 3, TGF-beta 1, TNF-alpha | 1.283E-11        | IL-1 beta, PDGF-R-beta, EGF, ACTA2, MMP-2, WNT, TGF-beta 3, TNF-alpha, TGF-beta 1 |
| Transcription_Role of VDR in regulation of genes involved in osteoporosis  | 2.507E-08     | 2.507E-08 | IL-1 beta, IFN-gamma, COL1A1, RUNX2, IGF-1, Osteocalcin, TNF-alpha                | 1.647E-04 | IL-1 beta, IFN-gamma, IGF-1, TNF-alpha                                            | 9.938E-06        | IL-1 beta, IFN-gamma, RUNX2, Osteocalcin, TNF-alpha                               |
| Transcription_Androgen Receptor nuclear signaling                          | 4.528E-08     | 3.428E-06 | EGF, MMP-2, IGF-1, TGF-beta 1, Beta-catenin                                       | 4.528E-08 | EGF, MMP-2, IGF-1, WNT, TGF-beta 1, Beta-catenin                                  | 2.160E-06        | EGF, MMP-2, WNT, TGF-beta 1, Beta-catenin                                         |
| Development_TGF-beta-dependent induction of EMT via RhoA, PI3K and ILK.    | 5.189E-08     | 1.237E-07 | ACTA2, SMURF1, TGF-beta 3, TGF-beta 1, Actin, Beta-catenin                        | 5.189E-08 | ACTA2, SMURF1, TGF-beta 3, TGF-beta 1, Actin, Beta-catenin                        | 7.036E-08        | ACTA2, SMURF1, TGF-beta 3, TGF-beta 1, Actin, Beta-catenin                        |
| Development_TGF-beta-dependent induction of EMT via MAPK                   | 5.929E-08     | 4.270E-06 | TGF-beta, MMP-2, FAK1, TGF-beta 3, TGF-beta 1                                     | 5.929E-08 | ITGB1, TGF-beta, MMP-2, FAK1, TGF-beta 3, TGF-beta 1                              | 8.038E-08        | ITGB1, TGF-beta, MMP-2, FAK1, TGF-beta 3, TGF-beta 1                              |
| Some pathways of EMT in cancer cells                                       | 9.812E-08     | 2.331E-07 | PDGF-R-beta, EGF, PDGF receptor, TGF-beta 1, TNF-alpha, Beta-catenin              | 9.812E-08 | PDGF-R-beta, EGF, PDGF receptor, TGF-beta 1, TNF-alpha, Beta-catenin              | 1.329E-07        | PDGF-R-beta, EGF, PDGF receptor, TNF-alpha, TGF-beta 1, Beta-catenin              |
| Cell adhesion_Chemokines and adhesion                                      | 2.906E-07     | 1.272E-05 | MMP-2, VEGFR-2, FAK1, CD44, Actin, Beta-catenin                                   | 2.906E-07 | VEGF-A, MMP-2, VEGFR-2, FAK1, CD44, Actin, Beta-catenin                           | 7.390E-06        | VEGF-A, MMP-2, FAK1, CD44, Actin, Beta-catenin                                    |
| Normal and pathological TGF-beta-mediated regulation of cell proliferation | 3.405E-07     | 2.490E-05 | PDGF-R-beta, PDGF receptor, TGF-beta 1, Beta-catenin                              | 3.405E-07 | PDGF-R-beta, PDGF receptor, TGF-beta 1, SMAD4, Beta-catenin                       | 1.726E-05        | PDGF-R-beta, PDGF receptor, TGF-beta 1, Beta-catenin                              |
| Development_TGF-beta-dependent induction of EMT via SMADs                  | 4.626E-07     | 3.162E-05 | TGF-beta, MMP-2, TGF-beta 3, TGF-beta 1                                           | 4.626E-07 | TGF-beta, MMP-2, TGF-beta 3, TGF-beta 1,                                          | 2.193E-05        | TGF-beta, MMP-2, TGF-beta 3, TGF-beta 1                                           |

|                                                              |           |           |                                                |           |                                                             |           |                                                    |
|--------------------------------------------------------------|-----------|-----------|------------------------------------------------|-----------|-------------------------------------------------------------|-----------|----------------------------------------------------|
|                                                              |           |           |                                                |           | SMAD4                                                       |           |                                                    |
| Cytoskeleton remodeling_TGF, WNT and cytoskeletal remodeling | 5.944E-07 | 2.775E-04 | VEGFR-2, FAK1, TGF-beta 1, Actin, Beta-catenin | 5.944E-07 | VEGF-A, VEGFR-2, FAK1, WNT, TGF-beta 1, Actin, Beta-catenin | 1.350E-05 | VEGF-A, FAK1, WNT, TGF-beta 1, Actin, Beta-catenin |
