# Supplementary material
Source: PubMed Central journal article supplement (PMC4096228)
Supplement: mp400573g_si_007.pdf [file mp400573g_si_007.pdf]

**Table S6: Pathway maps for Day 36**

|                                                                            |               | BMP-2     |                                                                              | TGF-β1    |                                                                                                                         | BMP-2 and TGF-β1 |                                                                               |
|----------------------------------------------------------------------------|---------------|-----------|------------------------------------------------------------------------------|-----------|-------------------------------------------------------------------------------------------------------------------------|------------------|-------------------------------------------------------------------------------|
| Maps                                                                       | Min (p Value) | p-value   | Genes from Active Data                                                       | p-value   | Genes from Active Data                                                                                                  | p-value          | Genes from Active Data                                                        |
| Development_Regulation of epithelial-to-mesenchymal transition (EMT)       | 2.507E-16     | 2.377E-10 | FGF2, PDGF-R-beta, HGF, ACTA2, ACTB, MMP-2, WNT, TNF-alpha, TGF-beta 1       | 2.507E-16 | IL-1 beta, FGF2, PDGF-R-beta, EGF, HGF, ACTA2, Frizzled, MMP-2, NOTCH1 receptor, WNT, TGF-beta 3, TNF-alpha, TGF-beta 1 | 1.925E-09        | FGF2, PDGF-R-beta, HGF, ACTA2, MMP-2, WNT, TGF-beta 3, TGF-beta 1             |
| Development_TGF-beta-dependent induction of EMT via MAPK                   | 6.054E-09     | 1.248E-05 | ITGB1, TGF-beta, alpha-V/beta-1 integrin, MMP-2, TGF-beta 1                  | 2.929E-08 | ITGB1, TGF-beta, alpha-V/beta-1 integrin, MMP-2, FAK1, TGF-beta 3, TGF-beta 1                                           | 6.054E-09        | ITGB1, TGF-beta, alpha-V/beta-1 integrin, MMP-2, FAK1, TGF-beta 3, TGF-beta 1 |
| Transcription_Androgen Receptor nuclear signaling                          | 2.137E-08     | 4.009E-07 | IL-6, MMP-2, IGF-1, WNT, TGF-beta 1, Beta-catenin                            | 2.137E-08 | IL-6, EGF, Frizzled, MMP-2, IGF-1, WNT, TGF-beta 1                                                                      | 1.593E-07        | IL-6, MMP-2, IGF-1, WNT, TGF-beta 1, Beta-catenin                             |
| Normal and pathological TGF-beta-mediated regulation of cell proliferation | 2.280E-08     | 5.791E-08 | FGF2, PDGF-R-beta, PDGF receptor, TGF-beta 1, Beta-catenin, ITGAV            | 2.910E-06 | FGF2, PDGF-R-beta, PDGF receptor, TGF-beta 1, ITGAV                                                                     | 2.280E-08        | FGF2, PDGF-R-beta, PDGF receptor, TGF-beta 1, Beta-catenin, ITGAV             |
| Cell adhesion_Chemokines and adhesion                                      | 6.953E-08     | 2.363E-07 | VEGF-A, Actin cytoskeletal, MMP-2, VEGFR-2, CD44, Actin, Beta-catenin, ITGAV | 6.561E-05 | VEGF-A, MMP-2, VEGFR-2, FAK1, Actin, ITGAV                                                                              | 6.953E-08        | VEGF-A, MMP-2, VEGFR-2, FAK1, CD44, Actin, Beta-catenin, ITGAV                |
| Development_TGF-beta-dependent induction of EMT via RhoA, PI3K and ILK.    | 1.825E-07     | 4.588E-07 | ACTA2, SMURF1, ACTB, TGF-beta 1, Actin, Beta-catenin                         | 1.567E-05 | ACTA2, SMURF1, TGF-beta 3, TGF-beta 1, Actin                                                                            | 1.825E-07        | ACTA2, SMURF1, TGF-beta 3, TGF-beta 1, Actin, Beta-catenin                    |
| Transcription_Role of VDR in regulation of genes involved in osteoporosis  | 1.883E-07     | 4.514E-05 | COL1A1, IL-6, RUNX2, IGF-1, TNF-alpha                                        | 1.883E-07 | IL-1 beta, IFN-gamma, COL1A1, IL-6, RUNX2, IGF-1, TNF-alpha                                                             | 1.015E-06        | IFN-gamma, COL1A1, IL-6, RUNX2, IGF-1, Osteocalcin                            |
| Immune response_MIF-mediated glucocorticoid regulation                     | 3.425E-07     | 1.104E-05 | IL-6, VCAM1, ICAM1, TNF-alpha                                                | 3.425E-07 | IFN-gamma, IL-6, VCAM1, ICAM1, TNF-alpha                                                                                | 2.389E-04        | IFN-gamma, IL-6, ICAM1                                                        |
| Development_Thrombospondin-1 signaling                                     | 4.074E-07     | 8.788E-07 | Caspase-3, VEGF-A, FGF2, VEGFR-2, TGF-beta 1                                 | 1.238E-06 | Caspase-3, VEGF-A, FGF2, VEGFR-2, TGF-beta 1                                                                            | 4.074E-07        | Caspase-3, VEGF-A, FGF2, VEGFR-2, TGF-beta 1                                  |

|                                     |           |           |             |           |                                                                              |           |       |
|-------------------------------------|-----------|-----------|-------------|-----------|------------------------------------------------------------------------------|-----------|-------|
| Development_Notch Signaling Pathway | 4.571E-07 | 3.201E-02 | HDAC1, PCAF | 4.571E-07 | HDAC1, NOTCH1 (NICD), NOTCH1 (NEXT), NOTCH1 precursor, NOTCH1 receptor, PCAF | 2.158E-01 | HDAC1 |
|-------------------------------------|-----------|-----------|-------------|-----------|------------------------------------------------------------------------------|-----------|-------|
