# Supplementary material
Source: PubMed Central journal article supplement (PMC4096228)
Supplement: mp400573g_si_008.pdf [file mp400573g_si_008.pdf]

**Table S7: Process Networks for Day 14**

|                                                                    |               | BMP-2     |                                                                                                                                                      | TGF- $\beta$ 1 |                                                                           | BMP-2 and TGF- $\beta$ 1 |                                                                                                                                                                                      |
|--------------------------------------------------------------------|---------------|-----------|------------------------------------------------------------------------------------------------------------------------------------------------------|----------------|---------------------------------------------------------------------------|--------------------------|--------------------------------------------------------------------------------------------------------------------------------------------------------------------------------------|
| Networks                                                           | Min (p-Value) | p-value   | Genes from Active Data                                                                                                                               | p-value        | Genes from Active Data                                                    | p-value                  | Genes from Active Data                                                                                                                                                               |
| Development_EMT_Regulation of epithelial-to-mesenchymal transition | 1.672E-15     | 5.678E-11 | IL-1 beta, PDGFR-beta, NOTCH1 (NICD), ITGB1, SOX9, TGF-beta, Frizzled, NOTCH1 (NEXT), PDGF receptor, NOTCH1 receptor, TGF-beta 3, BMP4, Beta-catenin | 1.158E-06      | ITGB1, SOX9, TGF-beta, ACTB, MMP-2, TGF-beta 3, Actin, Beta-catenin, RhoA | 1.672E-15                | IL-1 beta, SMURF, BMP2, NOTCH1 (NICD), ITGB1, SOX9, ACTA2, TGF-beta, Frizzled, NOTCH1 (NEXT), SMURF1, MMP-2, NOTCH1 receptor, FAK1, TGF-beta 3, TNF-alpha, Actin, BMP7, Beta-catenin |
| Cell adhesion_Platelet-endothelium-leucocyte interactions          | 3.367E-10     | 1.178E-08 | IL-1 beta, VEGF-A, PDGFR-beta, ITGB1, TGF-beta, von Willebrand factor, PDGF receptor, VEGFR-2, VCAM1, TGF-beta 3                                     | 1.473E-06      | ITGB1, TGF-beta, G-CSF, Endoglin, MMP-2, VEGFR-2, VCAM1, TGF-beta 3       | 3.367E-10                | IL-1 beta, ITGAX, ITGB1, TGF-beta, G-CSF, Endoglin, MMP-2, VEGFR-2, VCAM1, FAK1, CD44, TGF-beta 3, TNF-alpha                                                                         |
| Development_Blood vessel morphogenesis                             | 7.622E-10     | 7.622E-10 | IL-1 beta, VEGF-A, NOTCH1 (NICD), Notch, NOTCH1 (NEXT), NOTCH1 precursor, NOTCH1 receptor, VEGFR-2, VCAM1, Thy-1, BMP4, Beta-catenin                 | 7.370E-04      | VEGFR-2, VCAM1, Thy-1, FGF10, Beta-catenin, RhoA                          | 8.757E-09                | IL-1 beta, Caspase-3, NOTCH1 (NICD), Notch, NOTCH1 (NEXT), NOTCH1 precursor, NOTCH1 receptor, VEGFR-2, VCAM1, FGF10, Thy-1, PCAF, Beta-catenin                                       |
| Signal Transduction_BMP and GDF signaling                          | 1.023E-09     | 3.243E-07 | GDF5, HDAC1, SOX9, PPAR-gamma, IGF-1, Osteocalcin, BMP4                                                                                              | 2.162E-07      | RUNX2, HDAC1, SOX9, PPAR-gamma, IGF-1, Osteocalcin, Oct-3/4               | 1.023E-09                | BMP6, BMP2, SOX9, PPAR-gamma, SMURF1, IGF-1, Osteocalcin, Oct-3/4, CD44, BMP7                                                                                                        |
| Signal transduction_NOTCH signaling                                | 1.134E-09     | 1.134E-09 | VEGF-A, PDGFR-beta, NOTCH1 (NICD), TGF-                                                                                                              | 1.076E-01      | TGF-beta, TGF-beta 3, Beta-catenin                                        | 1.101E-06                | NOTCH1 (NICD), TGF-beta, Frizzled,                                                                                                                                                   |

|                                                                               |           |           |                                                                                                                 |           |                                                                                                                                  |           |                                                                                                                                |
|-------------------------------------------------------------------------------|-----------|-----------|-----------------------------------------------------------------------------------------------------------------|-----------|----------------------------------------------------------------------------------------------------------------------------------|-----------|--------------------------------------------------------------------------------------------------------------------------------|
|                                                                               |           |           | beta, Frizzled, NOTCH1 (NEXT), FZD9, PDGF receptor, NOTCH1 precursor, NOTCH1 receptor, TGF-beta 3, Beta-catenin |           |                                                                                                                                  |           | NOTCH1 (NEXT), FZD9, NOTCH1 precursor, NOTCH1 receptor, CD44, TGF-beta 3, PCAF, Beta-catenin                                   |
| Development_Neurogenesis_Axonal guidance                                      | 6.379E-09 | 1.472E-04 | alpha-6/beta-1 integrin, NGFR(TNFRSF 16), ITGB1, PPAR-gamma, BDNF, NGFR (ICD), NGFR (CTF)                       | 6.379E-09 | alpha-6/beta-1 integrin, NGFR(TNFRSF 16), ITGB1, PPAR-gamma, Actin cytoskeletal, ACTB, BDNF, NGFR (ICD), Actin, NGFR (CTF), RhoA | 2.949E-04 | NGFR(TNFRSF 16), ITGB1, PPAR-gamma, NGFR (ICD), FAK1, Actin, Integrin, NGFR (CTF)                                              |
| Development_Ossification and bone remodeling                                  | 1.717E-08 | 6.962E-08 | GDF5, Annexin V, TGF-beta, Frizzled, IGF-1, NOTCH1 receptor, Osteocalcin, BMP4, Beta-catenin                    | 6.452E-07 | Annexin V, HNF1, RUNX2, TGF-beta, IGF-1, Osteocalcin, HNF1-alpha, Beta-catenin                                                   | 1.717E-08 | BMP6, HNF1, BMP2, TGF-beta, Frizzled, IGF-1, NOTCH1 receptor, Osteocalcin, HNF1-alpha, BMP7, Beta-catenin                      |
| Cell adhesion_Amyloid proteins                                                | 1.616E-07 | 5.207E-06 | NGFR(TNFRSF 16), NOTCH1 (NICD), Frizzled, Notch, NGFR (ICD), NOTCH1 receptor, NGFR (CTF), Beta-catenin          | 3.326E-06 | NGFR(TNFRSF 16), Actin cytoskeletal, ACTB, NGFR (ICD), Actin, NGFR (CTF), Beta-catenin, RhoA                                     | 1.616E-07 | Caspase-3, NGFR(TNFRSF 16), NOTCH1 (NICD), Frizzled, Notch, NGFR (ICD), NOTCH1 receptor, FAK1, Actin, NGFR (CTF), Beta-catenin |
| Cardiac development_Wnt_beta-catenin, Notch, VEGF, IP3 and integrin signaling | 7.200E-07 | 7.200E-07 | VEGF-A, NOTCH1 (NICD), ITGB1, Frizzled, NOTCH1 (NEXT), NOTCH1 receptor, VEGFR-2, Beta-catenin                   | 5.886E-03 | ITGB1, VEGFR-2, Beta-catenin, RhoA                                                                                               | 1.477E-06 | NOTCH1 (NICD), ITGB1, ACTA2, Frizzled, NOTCH1 (NEXT), NOTCH1 receptor, VEGFR-2, FAK1, Beta-catenin                             |
| Cell adhesion_Glycoconjugates                                                 | 9.427E-07 | 1.480E-03 | alpha-6/beta-1 integrin, NGFR(TNFRSF 16), CD45,                                                                 | 9.427E-07 | alpha-6/beta-1 integrin, NGFR(TNFRSF 16), ITGB1,                                                                                 | 2.870E-05 | Caspase-3, NGFR(TNFRSF 16), CD45, ITGB1, FAK1,                                                                                 |

|  |  |  |             |  |                                                      |  |                          |
|--|--|--|-------------|--|------------------------------------------------------|--|--------------------------|
|  |  |  | ITGB1, BDNF |  | Actin<br>cytoskeletal,<br>ACTB, BDNF,<br>Actin, RhoA |  | CD44, Actin,<br>Integrin |
|--|--|--|-------------|--|------------------------------------------------------|--|--------------------------|
