# Supplementary material
Source: PubMed Central journal article supplement (PMC4096228)
Supplement: mp400573g_si_009.pdf [file mp400573g_si_009.pdf]

**Table S8: Process Networks for Day 21**

|                                                                    |               | BMP-2     |                                                                                                                                                                  | TGF- $\beta$ 1 |                                                                                                                                                                          | BMP-2 and TGF- $\beta$ 1 |                                                                                                                                                                   |
|--------------------------------------------------------------------|---------------|-----------|------------------------------------------------------------------------------------------------------------------------------------------------------------------|----------------|--------------------------------------------------------------------------------------------------------------------------------------------------------------------------|--------------------------|-------------------------------------------------------------------------------------------------------------------------------------------------------------------|
| Networks                                                           | Min (p-Value) | p-value   | Genes from Active Data                                                                                                                                           | p-value        | Genes from Active Data                                                                                                                                                   | p-value                  | Genes from Active Data                                                                                                                                            |
| Cell adhesion_Platelet-endothelium-leucocyte interactions          | 5.752E-17     | 2.030E-13 | IL-1 beta, ITGAX, PDGF-R-beta, EGF, HGF, TGF-beta, G-CSF, Endoglin, PDGF receptor, MMP-2, VEGFR-2, FAK1, CD44, TGF-beta 3, TGF-beta 1, TNF-alpha                 | 5.752E-17      | IL-1 beta, VEGF-A, ITGAX, PDGF-R-beta, ITGB1, EGF, TGF-beta, G-CSF, Endoglin, PDGF receptor, MMP-2, VEGFR-2, VCAM1, FAK1, CD44, TGF-beta 3, TGF-beta 1, TNF-alpha        | 1.953E-15                | IL-1 beta, VEGF-A, ITGAX, PDGF-R-beta, ITGB1, EGF, TGF-beta, G-CSF, Endoglin, PDGF receptor, MMP-2, VCAM1, FAK1, CD44, TGF-beta 3, TNF-alpha, TGF-beta 1          |
| Development_EMT_Regulation of epithelial-to-mesenchymal transition | 4.810E-16     | 8.369E-14 | IL-1 beta, SMURF, PDGF-R-beta, BMP2, EGF, HGF, ACTA2, TGF-beta, PDGF receptor, SMURF1, MMP-2, FAK1, TGF-beta 3, TGF-beta 1, TNF-alpha, Actin, BMP4, Beta-catenin | 4.810E-16      | IL-1 beta, SMURF, PDGF-R-beta, ITGB1, EGF, ACTA2, TGF-beta, PDGF receptor, SMURF1, MMP-2, FAK1, WNT, TGF-beta 3, TGF-beta 1, TNF-alpha, Actin, SMAD4, BMP4, Beta-catenin | 1.330E-14                | IL-1 beta, SMURF, PDGF-R-beta, ITGB1, EGF, ACTA2, TGF-beta, PDGF receptor, SMURF1, MMP-2, FAK1, WNT, TGF-beta 3, TNF-alpha, TGF-beta 1, Actin, BMP7, Beta-catenin |
| Signal Transduction_BMP and GDF signaling                          | 3.823E-12     | 3.823E-12 | GDF5, BMP6, RUNX2, HDAC1, BMP2, PPAR-gamma, SMURF1, IGF-1, Osteocalcin, Oct-3/4, CD44, BMP4                                                                      | 4.101E-05      | GDF5, SMURF1, IGF-1, CD44, SMAD4, BMP4                                                                                                                                   | 2.408E-07                | GDF5, RUNX2, HDAC1, PPAR-gamma, SMURF1, Osteocalcin, CD44, BMP7                                                                                                   |
| Development_Ossification and bone remodeling                       | 1.791E-10     | 1.791E-10 | GDF5, BMP6, Annexin V, HNF1, RUNX2, BMP2, TGF-beta, IGF-1, Osteocalcin, TGF-beta 1, HNF1-alpha, BMP4, Beta-catenin                                               | 9.041E-09      | GDF5, Annexin V, HNF1, TGF-beta, IGF-1, WNT, TGF-beta 1, SMAD4, HNF1-alpha, BMP4, Beta-catenin                                                                           | 1.503E-05                | GDF5, RUNX2, TGF-beta, Osteocalcin, WNT, TGF-beta 1, BMP7, Beta-catenin                                                                                           |
| Signal transduction_NOTCH signaling                                | 5.441E-10     | 9.031E-05 | PDGF-R-beta, EGF, TGF-beta, PDGF receptor, ErbB2, CD44, TGF-beta 3, TGF-beta 1, Beta-catenin                                                                     | 5.441E-10      | VEGF-A, PDGF-R-beta, EGF, TGF-beta, PDGF receptor, ErbB2, WNT, CD44, TGF-beta 3, TGF-beta 1, SMAD4, WNT3A, PCAF,                                                         | 8.135E-08                | VEGF-A, PDGF-R-beta, EGF, TGF-beta, PDGF receptor, ErbB2, WNT, CD44, TGF-beta 3, TGF-beta 1, WNT3A, Beta-catenin                                                  |

|                                                                    |           |            |                                                                                                                                 |            | Beta-catenin                                                                                            |            |                                                                                                             |
|--------------------------------------------------------------------|-----------|------------|---------------------------------------------------------------------------------------------------------------------------------|------------|---------------------------------------------------------------------------------------------------------|------------|-------------------------------------------------------------------------------------------------------------|
| Development_Cartilag development                                   | 1.765E-09 | 1.765 E-09 | GDF5, BMP6, IFN-gamma, COL1A1, RUNX2, BMP2, TGF-beta 3, TGF-beta 1, BMP4                                                        | 6.400 E-06 | GDF5, IFN-gamma, TGF-beta 3, TGF-beta 1, SMAD4, BMP4                                                    | 1.071 E-04 | GDF5, IFN-gamma, RUNX2, TGF-beta 3, TGF-beta 1                                                              |
| Apoptosis_Anti-Apoptosis mediated by external signals via PI3K/AKT | 2.297E-09 | 2.297 E-09 | IL-1 beta, Caspase-3, NGFR(TNFRSF16), PDGF-R-beta, EGF, HGF, PDGF receptor, BDNF, ErbB2, IGF-1, VEGFR-2, FAK1, TNF-alpha, FGF10 | 5.593 E-08 | IL-1 beta, VEGF-A, PDGF-R-beta, EGF, PDGF receptor, BDNF, ErbB2, IGF-1, VEGFR-2, FAK1, TNF-alpha, FGF10 | 6.481 E-07 | IL-1 beta, Caspase-3, NGFR(TNFRSF16), VEGF-A, PDGF-R-beta, EGF, PDGF receptor, BDNF, ErbB2, FAK1, TNF-alpha |
| Signal Transduction_TGF-beta, GDF and Activin signaling            | 2.580E-07 | 2.580 E-07 | RUNX2, HDAC1, Endoglin, SMURF1, IGF-1, Oct-3/4, FAK1, TGF-beta 3, TGF-beta 1, Integrin                                          | 1.021 E-05 | Endoglin, SMURF1, IGF-1, FAK1, TGF-beta 3, TGF-beta 1, Integrin, SMAD4                                  | 1.185 E-05 | RUNX2, HDAC1, Endoglin, SMURF1, FAK1, TGF-beta 3, TGF-beta 1, Integrin                                      |
| Signal transduction_WNT signaling                                  | 3.572E-07 | 4.719 E-04 | EGF, TGF-beta, MMP-2, CD44, TGF-beta 3, TGF-beta 1, Beta-catenin                                                                | 3.572 E-07 | VEGF-A, EGF, TGF-beta, MMP-2, WNT, CD44, TGF-beta 3, TGF-beta 1, WNT3A, Beta-catenin                    | 4.328 E-07 | VEGF-A, EGF, TGF-beta, MMP-2, WNT, CD44, TGF-beta 3, TGF-beta 1, WNT3A, Beta-catenin                        |
| Development_Blood vessel morphogenesis                             | 4.230E-07 | 6.917 E-05 | IL-1 beta, Caspase-3, EGF, ErbB2, VEGFR-2, FGF10, Thy-1, BMP4, Beta-catenin                                                     | 4.230 E-07 | IL-1 beta, VEGF-A, EGF, ErbB2, VEGFR-2, VCAM1, FGF10, Thy-1, BMP4, PCAF, Beta-catenin                   | 2.123 E-04 | IL-1 beta, Caspase-3, VEGF-A, EGF, ErbB2, VCAM1, Thy-1, Beta-catenin                                        |
