# Supplementary material
Source: PubMed Central journal article supplement (PMC4096228)
Supplement: mp400573g_si_010.pdf [file mp400573g_si_010.pdf]

**Table S9: Process Networks for Day 36**

| Networks                                                           | BMP-2         |           |                                                                                                                                                                                                     | TGF-β1    |                                                                                                                                                                                                                                                                      | BMP-2 and TGF-β1 |                                                                                                                                                                                                |
|--------------------------------------------------------------------|---------------|-----------|-----------------------------------------------------------------------------------------------------------------------------------------------------------------------------------------------------|-----------|----------------------------------------------------------------------------------------------------------------------------------------------------------------------------------------------------------------------------------------------------------------------|------------------|------------------------------------------------------------------------------------------------------------------------------------------------------------------------------------------------|
|                                                                    | Min (p-Value) | p-value   | Genes from Active Data                                                                                                                                                                              | p-value   | Genes from Active Data                                                                                                                                                                                                                                               | p-value          | Genes from Active Data                                                                                                                                                                         |
| Development_EMT_Regulation of epithelial-to-mesenchymal transition | 7.550E-23     | 2.329E-17 | SMURF, FGF2, PDGF-R-beta, BMP2, ITGB1, SOX9, HGF, ACTA2, TGF-beta, PDGF receptor, alpha-V/beta-1 integrin, SMURF1, ACTB, MMP-2, WNT, TNF-alpha, TGF-beta 1, Actin, Nestin, BMP4, BMP7, Beta-catenin | 7.550E-23 | IL-1 beta, SMURF, FGF2, PDGF-R-beta, BMP2, NOTCH1 (NICD), ITGB1, EGF, HGF, ACTA2, TGF-beta, Frizzled, NOTCH1 (NEXT), PDGF receptor, alpha-V/beta-1 integrin, SMURF1, MMP-2, NOTCH1 receptor, FAK1, WNT, TGF-beta 3, TNF-alpha, TGF-beta 1, Actin, Nestin, BMP4, BMP7 | 3.869E-17        | SMURF, FGF2, PDGF-R-beta, BMP2, ITGB1, HGF, ACTA2, TGF-beta, PDGF receptor, alpha-V/beta-1 integrin, SMURF1, MMP-2, FAK1, WNT, TGF-beta 3, TGF-beta 1, Actin, Nestin, BMP4, BMP7, Beta-catenin |
| Cell adhesion_Platelet-endothelium-leucocyte interactions          | 1.127E-15     | 1.917E-12 | VEGF-A, IL-6, FGF2, PDGF-R-beta, ITGB1, HGF, TGF-beta, Endoglin, PDGF receptor, MMP-2, VEGFR-2, VCAM1, ICAM1, CD44, TNF-alpha, TGF-beta 1                                                           | 1.977E-15 | IL-1 beta, VEGF-A, ITGAX, IL-6, FGF2, PDGF-R-beta, ITGB1, EGF, HGF, TGF-beta, PDGF receptor, MMP-2, VEGFR-2, VCAM1, FAK1, ICAM1, TGF-beta 3, TNF-alpha, TGF-beta 1                                                                                                   | 1.127E-15        | VEGF-A, ITGAX, IL-6, FGF2, PDGF-R-beta, ITGB1, HGF, TGF-beta, von Willebrand factor, Endoglin, PDGF receptor, MMP-2, VEGFR-2, FAK1, ICAM1, CD44, TGF-beta 3, TGF-beta 1                        |
| Signal Transduction_BMP and GDF signaling                          | 2.405E-13     | 9.175E-13 | GDF5, BMP6, RUNX2, HDAC1, BMP2, SOX9, PPAR-gamma, SMURF1, IGF-1, Oct-3/4, CD44, BMP4, BMP7                                                                                                          | 9.002E-10 | GDF5, BMP6, RUNX2, HDAC1, BMP2, PPAR-gamma, SMURF1, IGF-1, Oct-3/4, BMP4, BMP7                                                                                                                                                                                       | 2.405E-13        | GDF5, BMP6, RUNX2, HDAC1, BMP2, PPAR-gamma, SMURF1, IGF-1, Osteocalcin, Oct-3/4, CD44, BMP4, BMP7                                                                                              |
| Development_Blood vessel morphogenesis                             | 3.192E-12     | 7.507E-07 | Caspase-3, VEGF-A, FGF2, ErbB2, TERT, VEGFR-2, VCAM1, ICAM1, Thy-1, BMP4, PCAF, Beta-catenin                                                                                                        | 3.192E-12 | IL-1 beta, Caspase-3, VEGF-A, FGF2, NOTCH1 (NICD), EGF, Notch, NOTCH1 (NEXT), NOTCH1                                                                                                                                                                                 | 9.140E-05        | Caspase-3, VEGF-A, FGF2, ErbB2, VEGFR-2, ICAM1, Thy-1, BMP4, Beta-catenin                                                                                                                      |

|                                                                               |           |           |                                                                                                                                |           |                                                                                                                                                                                     |           |                                                                                                                           |
|-------------------------------------------------------------------------------|-----------|-----------|--------------------------------------------------------------------------------------------------------------------------------|-----------|-------------------------------------------------------------------------------------------------------------------------------------------------------------------------------------|-----------|---------------------------------------------------------------------------------------------------------------------------|
|                                                                               |           |           |                                                                                                                                |           | precursor, ErbB2, TERT, NOTCH1 receptor, VEGFR-2, VCAM1, ICAM1, Thy-1, BMP4, PCAF                                                                                                   |           |                                                                                                                           |
| Development_Ossification and bone remodeling                                  | 1.929E-11 | 7.899E-11 | GDF5, BMP6, Annexin V, HNF1, RUNX2, BMP2, TGF-beta, IGF-1, WNT, TGF-beta 1, HNF1-alpha, BMP4, BMP7, Beta-catenin               | 2.277E-10 | GDF5, BMP6, HNF1, RUNX2, BMP2, TGF-beta, Frizzled, IGF-1, NOTCH1 receptor, WNT, TGF-beta 1, HNF1-alpha, BMP4, BMP7                                                                  | 1.929E-11 | GDF5, BMP6, HNF1, RUNX2, BMP2, TGF-beta, IGF-1, Osteocalcin, WNT, TGF-beta 1, HNF1-alpha, BMP4, BMP7, Beta-catenin        |
| Signal transduction_NOTCH signaling                                           | 6.160E-11 | 7.466E-06 | VEGF-A, PDGF-R-beta, TGF-beta, PDGF receptor, ErbB2, WNT, CD44, TGF-beta 1, WNT3A, PCAF, Beta-catenin                          | 6.160E-11 | VEGF-A, PDGF-R-beta, NOTCH1 (NICD), EGF, TGF-beta, Frizzled, NOTCH1 (NEXT), FZD9, PDGF receptor, NOTCH1 precursor, ErbB2, NOTCH1 receptor, WNT, TGF-beta 3, TGF-beta 1, WNT3A, PCAF | 2.781E-06 | VEGF-A, PDGF-R-beta, TGF-beta, PDGF receptor, ErbB2, WNT, CD44, TGF-beta 3, TGF-beta 1, WNT3A, Beta-catenin               |
| Apoptosis_Anti-Apoptosis mediated by external signals via PI3K/AKT            | 5.044E-10 | 1.443E-08 | Caspase-3, NGFR(TNFRSF16), VEGF-A, IL-6, FGF2, PDGF-R-beta, HGF, PDGF receptor, BDNF, ErbB2, IGF-1, VEGFR-2, TNF-alpha, GM-CSF | 5.044E-10 | IL-1 beta, Caspase-3, NGFR(TNFRSF16), VEGF-A, IL-6, FGF2, PDGF-R-beta, EGF, HGF, PDGF receptor, ErbB2, IGF-1, VEGFR-2, FAK1, TNF-alpha, GM-CSF                                      | 3.745E-09 | Caspase-3, NGFR(TNFRSF16), VEGF-A, IL-6, FGF2, PDGF-R-beta, HGF, PDGF receptor, BDNF, ErbB2, IGF-1, VEGFR-2, FAK1, GM-CSF |
| Development_Cartilag development                                              | 2.430E-09 | 1.140E-07 | GDF5, BMP6, COL1A1, RUNX2, BMP2, SOX9, TGF-beta 1, BMP4                                                                        | 1.161E-08 | GDF5, BMP6, IFN-gamma, COL1A1, RUNX2, BMP2, TGF-beta 3, TGF-beta 1, BMP4                                                                                                            | 2.430E-09 | GDF5, BMP6, IFN-gamma, COL1A1, RUNX2, BMP2, TGF-beta 3, TGF-beta 1, BMP4                                                  |
| Cardiac development_Wnt beta-catenin, Notch, VEGF, IP3 and integrin signaling | 1.755E-08 | 5.726E-05 | VEGF-A, ITGB1, ACTA2, VEGFR-2, WNT, TBX5, WNT3A, Beta-catenin                                                                  | 1.755E-08 | VEGF-A, NOTCH1 (NICD), ITGB1, ACTA2, Frizzled, NOTCH1 (NEXT), NOTCH1 receptor, VEGFR-2, FAK1, WNT,                                                                                  | 2.798E-05 | VEGF-A, ITGB1, ACTA2, VEGFR-2, FAK1, WNT, WNT3A, Beta-catenin                                                             |

|                                                         |           |           |                                                                  |           |                                                                                                      |           |                                                                                              |
|---------------------------------------------------------|-----------|-----------|------------------------------------------------------------------|-----------|------------------------------------------------------------------------------------------------------|-----------|----------------------------------------------------------------------------------------------|
|                                                         |           |           |                                                                  |           | TBX5, WNT3A                                                                                          |           |                                                                                              |
| Signal Transduction_TGF-beta, GDF and Activin signaling | 3.261E-08 | 6.292E-05 | IL-6, RUNX2, HDAC1, Endoglin, SMURF1, IGF-1, Oct-3/4, TGF-beta 1 | 2.062E-07 | IL-6, RUNX2, HDAC1, NOTCH1 precursor, SMURF1, IGF-1, Oct-3/4, FAK1, TGF-beta 3, TGF-beta 1, Integrin | 3.261E-08 | IL-6, RUNX2, HDAC1, Endoglin, SMURF1, IGF-1, Oct-3/4, FAK1, TGF-beta 3, TGF-beta 1, Integrin |
